# Supplementary material for: Competing endogenous RNAs in human astrocytes: crosstalk and interacting networks in response to lipotoxicity
Source: Front Neurosci. 2023 Nov 13;17:1195840. doi: 10.3389/fnins.2023.1195840 (PMC10679742; doi:10.3389/fnins.2023.1195840)
Supplement: Supplementary file 1 [file Table_1.XLSX]

## Sheet: Hoja1
Table S1. Primer sequences for the miRNAs RT-qPCR.
Primer name	Forward primer 5'-3'	Reverse primer 5'-3'
GAPDH	CATCAATGGAAATCCCATCA	TTCTCCATGGTGGTGAAGAC
MEG3(ENST00000398461)	GCTGAAGAACTGCGGATGGA	CATTCGAGGTCCCTTCCCAC
ATF6B	GGGAGATGACCCAACATCCT	TCTCCTATAAAAGCCTGGCTGG
