# Supplementary material for: Competing endogenous RNAs in human astrocytes: crosstalk and interacting networks in response to lipotoxicity
Source: Front Neurosci. 2023 Nov 13;17:1195840. doi: 10.3389/fnins.2023.1195840 (PMC10679742; doi:10.3389/fnins.2023.1195840)
Supplement: Supplementary file 2 [file Table_2.XLSX]

## Sheet: PA-DEG_up
gene_id	PAvsVH_symbol	PAvsVH_biotype	PAvsVH_logFC	PAvsVH_PValue	PAvsVH_FDR
ENSG00000234518	PTGES3P1	processed_pseudogene	2.33029	4.33113e-05	0.000398528
ENSG00000258967	HMGN1P3	processed_pseudogene	1.74943	0.000224426	0.00142827
ENSG00000000938	FGR	protein_coding	5.33183	0.00255824	0.00976121
ENSG00000001084	GCLC	protein_coding	2.0973	1.41891e-08	1.021e-06
ENSG00000001630	CYP51A1	protein_coding	1.32256	1.9372e-08	1.2617e-06
ENSG00000002549	LAP3	protein_coding	1.95151	4.98624e-06	7.36626e-05
ENSG00000006210	CX3CL1	protein_coding	2.45525	2.98657e-06	4.98205e-05
ENSG00000006451	RALA	protein_coding	1.13817	6.06898e-07	1.46634e-05
ENSG00000011021	CLCN6	protein_coding	1.36237	3.12064e-05	0.000307547
ENSG00000011422	PLAUR	protein_coding	1.47175	3.84659e-05	0.000362858
ENSG00000023445	BIRC3	protein_coding	2.73724	3.06858e-09	3.48237e-07
ENSG00000023909	GCLM	protein_coding	1.48615	5.0444e-10	1.02115e-07
ENSG00000025708	TYMP	protein_coding	2.83301	5.41247e-06	7.79284e-05
ENSG00000044574	HSPA5	protein_coding	1.30802	5.22318e-08	2.64335e-06
ENSG00000047365	ARAP2	protein_coding	1.57838	9.51293e-05	0.000736834
ENSG00000047634	SCML1	protein_coding	1.04394	0.000232842	0.00146732
ENSG00000049130	KITLG	protein_coding	1.77691	6.60784e-05	0.000550089
ENSG00000051108	HERPUD1	protein_coding	1.4631	6.40543e-07	1.52792e-05
ENSG00000052795	FNIP2	protein_coding	2.21618	1.38165e-07	4.99239e-06
ENSG00000052802	MSMO1	protein_coding	1.35218	2.26908e-09	3.0349e-07
ENSG00000055332	EIF2AK2	protein_coding	1.02963	1.70807e-06	3.26363e-05
ENSG00000056558	TRAF1	protein_coding	1.40147	5.19496e-06	7.58485e-05
ENSG00000057252	SOAT1	protein_coding	1.53698	7.88575e-09	6.6259e-07
ENSG00000059378	PARP12	protein_coding	1.81476	2.58672e-08	1.62811e-06
ENSG00000059728	MXD1	protein_coding	1.76801	3.26962e-09	3.60139e-07
ENSG00000059804	SLC2A3	protein_coding	1.71491	2.63193e-09	3.39882e-07
ENSG00000065833	ME1	protein_coding	1.08729	1.40026e-05	0.000165425
ENSG00000067066	SP100	protein_coding	1.57206	5.7499e-07	1.39375e-05
ENSG00000067082	KLF6	protein_coding	1.65767	1.03819e-08	8.18534e-07
ENSG00000068079	IFI35	protein_coding	1.75118	2.23126e-06	3.97908e-05
ENSG00000069956	MAPK6	protein_coding	1.12169	3.28808e-08	1.93919e-06
ENSG00000070961	ATP2B1	protein_coding	1.27696	4.93234e-09	4.76946e-07
ENSG00000072571	HMMR	protein_coding	2.22682	2.22814e-07	7.10161e-06
ENSG00000073756	PTGS2	protein_coding	3.20497	0.000208937	0.00135258
ENSG00000074410	CA12	protein_coding	1.11541	0.000606928	0.00311576
ENSG00000078018	MAP2	protein_coding	1.04746	0.0202418	0.049778
ENSG00000079459	FDFT1	protein_coding	1.02537	5.50847e-08	2.76902e-06
ENSG00000087074	PPP1R15A	protein_coding	2.59519	3.91426e-10	8.62288e-08
ENSG00000088448	ANKRD10	protein_coding	1.21498	4.74528e-07	1.20892e-05
ENSG00000089127	OAS1	protein_coding	2.47302	2.46519e-07	7.66152e-06
ENSG00000090339	ICAM1	protein_coding	2.90683	2.88374e-08	1.75603e-06
ENSG00000095794	CREM	protein_coding	1.19049	3.90737e-07	1.04522e-05
ENSG00000096968	JAK2	protein_coding	1.52605	0.000182067	0.00120894
ENSG00000099194	SCD	protein_coding	2.79354	1.41734e-13	2.12317e-10
ENSG00000100219	XBP1	protein_coding	1.61602	1.20267e-08	9.09902e-07
ENSG00000100292	HMOX1	protein_coding	3.67692	1.89592e-07	6.31132e-06
ENSG00000100644	HIF1A	protein_coding	1.24165	9.07291e-07	1.99871e-05
ENSG00000100906	NFKBIA	protein_coding	2.27922	1.18458e-08	9.05361e-07
ENSG00000101255	TRIB3	protein_coding	2.64215	1.58913e-06	3.07561e-05
ENSG00000101347	SAMHD1	protein_coding	2.08797	4.38182e-08	2.34427e-06
ENSG00000101670	LIPG	protein_coding	1.25123	1.01281e-07	4.15734e-06
ENSG00000102554	KLF5	protein_coding	1.01151	1.83617e-05	0.000204656
ENSG00000103855	CD276	protein_coding	1.09981	1.87212e-09	2.74449e-07
ENSG00000104312	RIPK2	protein_coding	1.56671	1.29485e-05	0.000155672
ENSG00000104419	NDRG1	protein_coding	3.16232	8.41144e-08	3.68195e-06
ENSG00000104549	SQLE	protein_coding	1.06863	3.40881e-07	9.4214e-06
ENSG00000104635	SLC39A14	protein_coding	1.31658	4.40996e-09	4.52474e-07
ENSG00000104687	GSR	protein_coding	1.03669	1.41494e-05	0.000166634
ENSG00000105835	NAMPT	protein_coding	3.13118	6.28e-12	4.27611e-09
ENSG00000105939	ZC3HAV1	protein_coding	1.6067	4.67296e-09	4.66673e-07
ENSG00000107201	DDX58	protein_coding	2.38431	1.99959e-07	6.52708e-06
ENSG00000107798	LIPA	protein_coding	2.14202	0.000778947	0.0037836
ENSG00000107984	DKK1	protein_coding	1.48192	0.0175897	0.0446903
ENSG00000108179	PPIF	protein_coding	1.27246	0.000105429	0.000793251
ENSG00000108551	RASD1	protein_coding	1.64159	0.000430419	0.00236637
ENSG00000108582	CPD	protein_coding	1.1523	1.27216e-06	2.58926e-05
ENSG00000108688	CCL7	protein_coding	3.84018	0.000621601	0.00316721
ENSG00000108700	CCL8	protein_coding	5.35789	0.000482194	0.00257974
ENSG00000109320	NFKB1	protein_coding	1.35312	4.44417e-06	6.77939e-05
ENSG00000109814	UGDH	protein_coding	1.14441	1.35345e-06	2.71778e-05
ENSG00000111331	OAS3	protein_coding	2.29897	6.30558e-08	3.02749e-06
ENSG00000111335	OAS2	protein_coding	2.9009	1.99456e-06	3.67607e-05
ENSG00000111341	MGP	protein_coding	1.11063	0.00170802	0.007106
ENSG00000111912	NCOA7	protein_coding	2.09211	4.4229e-06	6.77455e-05
ENSG00000112096	SOD2	protein_coding	3.22772	9.15924e-10	1.67324e-07
ENSG00000112972	HMGCS1	protein_coding	1.59316	1.62573e-09	2.43534e-07
ENSG00000113013	HSPA9	protein_coding	1.34209	3.69243e-10	8.62288e-08
ENSG00000113070	HBEGF	protein_coding	1.14951	2.1291e-06	3.8334e-05
ENSG00000113161	HMGCR	protein_coding	1.40095	3.30775e-06	5.40941e-05
ENSG00000113263	ITK	protein_coding	3.66933	4.01933e-06	6.28492e-05
ENSG00000113615	SEC24A	protein_coding	1.11541	5.25125e-06	7.63725e-05
ENSG00000113742	CPEB4	protein_coding	1.21043	2.58656e-07	7.96323e-06
ENSG00000114127	XRN1	protein_coding	1.37327	2.64649e-05	0.000271537
ENSG00000115267	IFIH1	protein_coding	2.48543	9.88771e-08	4.11939e-06
ENSG00000115415	STAT1	protein_coding	1.15158	2.27667e-06	4.03346e-05
ENSG00000115520	COQ10B	protein_coding	1.00726	1.5264e-07	5.34241e-06
ENSG00000115594	IL1R1	protein_coding	1.06593	0.00115765	0.00522652
ENSG00000115963	RND3	protein_coding	3.03538	2.03439e-11	1.0884e-08
ENSG00000116016	EPAS1	protein_coding	1.01629	0.0109876	0.0308922
ENSG00000116285	ERRFI1	protein_coding	1.07668	7.47233e-06	0.000100864
ENSG00000116514	RNF19B	protein_coding	1.86488	4.39769e-06	6.76359e-05
ENSG00000116741	RGS2	protein_coding	1.59648	0.000108596	0.000808532
ENSG00000116954	RRAGC	protein_coding	1.07628	2.88539e-09	3.40375e-07
ENSG00000117152	RGS4	protein_coding	1.10289	0.0202975	0.0498289
ENSG00000117226	GBP3	protein_coding	1.20628	4.42588e-05	0.000404655
ENSG00000117228	GBP1	protein_coding	2.32728	3.87684e-07	1.04077e-05
ENSG00000117500	TMED5	protein_coding	1.00277	2.29469e-07	7.28274e-06
ENSG00000118503	TNFAIP3	protein_coding	1.97019	2.64152e-07	8.04268e-06
ENSG00000118515	SGK1	protein_coding	1.5915	0.00294227	0.0108858
ENSG00000118785	SPP1	protein_coding	1.9393	5.9805e-08	2.94697e-06
ENSG00000119917	IFIT3	protein_coding	3.45328	1.27096e-09	1.98591e-07
ENSG00000119922	IFIT2	protein_coding	4.74189	2.80171e-09	3.40375e-07
ENSG00000120063	GNA13	protein_coding	1.00032	1.50376e-07	5.338e-06
ENSG00000120217	CD274	protein_coding	2.87222	2.30424e-06	4.06591e-05
ENSG00000120306	CYSTM1	protein_coding	1.04775	3.39367e-08	1.98583e-06
ENSG00000120334	CENPL	protein_coding	1.64482	2.72509e-07	8.16436e-06
ENSG00000120437	ACAT2	protein_coding	1.01086	0.0124204	0.0339716
ENSG00000120526	NUDCD1	protein_coding	1.00644	0.000408629	0.00227556
ENSG00000121039	RDH10	protein_coding	1.51411	1.07125e-06	2.28594e-05
ENSG00000121060	TRIM25	protein_coding	1.85225	7.26922e-09	6.33099e-07
ENSG00000121769	FABP3	protein_coding	3.41937	4.05616e-05	0.000376464
ENSG00000121858	TNFSF10	protein_coding	2.98334	0.000180633	0.00120261
ENSG00000122643	NT5C3A	protein_coding	1.02499	7.30549e-05	0.000592188
ENSG00000122861	PLAU	protein_coding	1.03772	6.41406e-05	0.000537977
ENSG00000122877	EGR2	protein_coding	2.33088	9.69618e-06	0.000123932
ENSG00000123094	RASSF8	protein_coding	1.02818	1.09523e-07	4.30543e-06
ENSG00000123609	NMI	protein_coding	1.60512	3.43964e-08	1.99713e-06
ENSG00000123983	ACSL3	protein_coding	1.47116	1.87036e-10	5.18851e-08
ENSG00000124201	ZNFX1	protein_coding	1.34396	5.35212e-09	4.77593e-07
ENSG00000124226	RNF114	protein_coding	1.14035	8.45521e-08	3.68195e-06
ENSG00000125347	IRF1	protein_coding	2.89754	9.01273e-12	5.62545e-09
ENSG00000126709	IFI6	protein_coding	1.35037	0.00106724	0.00489807
ENSG00000127948	POR	protein_coding	1.00252	1.10223e-07	4.30543e-06
ENSG00000128016	ZFP36	protein_coding	2.08883	0.000200144	0.00130128
ENSG00000128335	APOL2	protein_coding	1.84541	9.21039e-07	2.02304e-05
ENSG00000128342	LIF	protein_coding	1.18192	4.7902e-05	0.000429684
ENSG00000128590	DNAJB9	protein_coding	2.00279	6.06222e-10	1.1949e-07
ENSG00000129226	CD68	protein_coding	4.45789	0.00117739	0.00528813
ENSG00000129315	CCNT1	protein_coding	1.05225	1.56162e-05	0.00017967
ENSG00000129667	RHBDF2	protein_coding	1.17111	8.26025e-05	0.00065285
ENSG00000130066	SAT1	protein_coding	1.47522	4.01606e-08	2.18074e-06
ENSG00000130164	LDLR	protein_coding	3.16703	5.50689e-17	4.12466e-13
ENSG00000130294	KIF1A	protein_coding	1.07918	0.00181031	0.0074583
ENSG00000130303	BST2	protein_coding	1.972	1.15394e-05	0.000142389
ENSG00000130513	GDF15	protein_coding	2.14078	2.28682e-05	0.000244341
ENSG00000130589	HELZ2	protein_coding	1.63955	2.22435e-06	3.97622e-05
ENSG00000130766	SESN2	protein_coding	1.41316	4.32321e-06	6.71802e-05
ENSG00000130775	THEMIS2	protein_coding	2.19601	6.65806e-07	1.57315e-05
ENSG00000131203	IDO1	protein_coding	4.61828	0.000436367	0.0023862
ENSG00000131370	SH3BP5	protein_coding	1.18829	5.45653e-11	1.8577e-08
ENSG00000132109	TRIM21	protein_coding	1.42236	9.23604e-08	3.90836e-06
ENSG00000132530	XAF1	protein_coding	2.40922	3.9053e-06	6.15803e-05
ENSG00000133106	EPSTI1	protein_coding	2.34682	5.21596e-06	7.60069e-05
ENSG00000133134	BEX2	protein_coding	1.36533	2.40079e-06	4.14331e-05
ENSG00000133321	PLAAT4	protein_coding	1.86519	3.41431e-05	0.000330402
ENSG00000133639	BTG1	protein_coding	1.36559	3.8028e-10	8.62288e-08
ENSG00000133773	CCDC59	protein_coding	1.01468	2.93212e-07	8.53278e-06
ENSG00000133874	RNF122	protein_coding	1.69721	0.00039819	0.00223454
ENSG00000133961	NUMB	protein_coding	1.04573	0.000405637	0.00226733
ENSG00000134070	IRAK2	protein_coding	2.12767	1.9988e-09	2.7724e-07
ENSG00000134107	BHLHE40	protein_coding	1.39957	0.000149738	0.00103272
ENSG00000134321	RSAD2	protein_coding	4.61513	2.87512e-09	3.40375e-07
ENSG00000134324	LPIN1	protein_coding	1.62916	3.66022e-11	1.4429e-08
ENSG00000134326	CMPK2	protein_coding	3.40227	3.52498e-08	2.00307e-06
ENSG00000134802	SLC43A3	protein_coding	2.28402	0.000602841	0.00310328
ENSG00000134824	FADS2	protein_coding	1.94529	6.10994e-12	4.27611e-09
ENSG00000135047	CTSL	protein_coding	1.47916	1.64458e-07	5.6246e-06
ENSG00000135114	OASL	protein_coding	3.31444	1.64938e-06	3.1758e-05
ENSG00000135148	TRAFD1	protein_coding	1.58575	1.34919e-05	0.000161229
ENSG00000135473	PAN2	protein_coding	1.75514	2.59416e-07	7.96323e-06
ENSG00000135899	SP110	protein_coding	2.21471	1.25286e-07	4.7038e-06
ENSG00000136235	GPNMB	protein_coding	3.69299	0.000851286	0.00405606
ENSG00000136244	IL6	protein_coding	1.49126	0.000104264	0.00078962
ENSG00000136514	RTP4	protein_coding	2.43791	5.70114e-06	8.07289e-05
ENSG00000136997	MYC	protein_coding	1.04972	2.56652e-05	0.000265148
ENSG00000137033	IL33	protein_coding	1.57107	0.00605849	0.0192198
ENSG00000137193	PIM1	protein_coding	1.23051	0.000272486	0.00164723
ENSG00000137575	SDCBP	protein_coding	1.28047	6.15667e-07	1.478e-05
ENSG00000137628	DDX60	protein_coding	1.68811	3.62723e-07	9.918e-06
ENSG00000137767	SQOR	protein_coding	2.27025	0.00194905	0.0079339
ENSG00000137959	IFI44L	protein_coding	1.74672	1.51935e-06	2.97183e-05
ENSG00000137965	IFI44	protein_coding	1.1838	2.69642e-06	4.55896e-05
ENSG00000138018	SELENOI	protein_coding	1.14341	5.23742e-05	0.00046424
ENSG00000138035	PNPT1	protein_coding	1.70375	6.51555e-08	3.08595e-06
ENSG00000138166	DUSP5	protein_coding	2.42668	1.12114e-08	8.65707e-07
ENSG00000138642	HERC6	protein_coding	2.09276	2.9392e-07	8.53278e-06
ENSG00000138646	HERC5	protein_coding	3.44117	2.9745e-09	3.42754e-07
ENSG00000138678	GPAT3	protein_coding	1.26709	0.000628288	0.00319693
ENSG00000138755	CXCL9	protein_coding	5.50789	0.000193989	0.00127111
ENSG00000138821	SLC39A8	protein_coding	1.09462	3.94607e-05	0.000369451
ENSG00000139289	PHLDA1	protein_coding	1.42024	1.75234e-08	1.19319e-06
ENSG00000139318	DUSP6	protein_coding	1.25599	7.63737e-05	0.000612461
ENSG00000139370	SLC15A4	protein_coding	1.57341	2.62869e-11	1.15817e-08
ENSG00000140105	WARS1	protein_coding	2.64695	1.18233e-07	4.54135e-06
ENSG00000140853	NLRC5	protein_coding	1.35006	4.0383e-07	1.06343e-05
ENSG00000140941	MAP1LC3B	protein_coding	1.08138	1.03788e-08	8.18534e-07
ENSG00000141458	NPC1	protein_coding	2.26505	9.37074e-15	2.33956e-11
ENSG00000141574	SECTM1	protein_coding	1.9006	0.000261849	0.00159711
ENSG00000141682	PMAIP1	protein_coding	3.09628	1.04581e-07	4.21133e-06
ENSG00000142657	PGD	protein_coding	1.22402	1.7282e-07	5.85711e-06
ENSG00000143333	RGS16	protein_coding	1.81374	1.35939e-05	0.000161617
ENSG00000143479	DYRK3	protein_coding	1.73269	6.168e-08	2.98054e-06
ENSG00000143751	SDE2	protein_coding	1.14153	5.01497e-07	1.26472e-05
ENSG00000144655	CSRNP1	protein_coding	1.75515	2.41912e-06	4.16534e-05
ENSG00000144802	NFKBIZ	protein_coding	1.16796	0.000433596	0.0023765
ENSG00000145685	LHFPL2	protein_coding	1.08782	0.000471036	0.00253271
ENSG00000145779	TNFAIP8	protein_coding	1.26171	1.20541e-05	0.000147524
ENSG00000145780	FEM1C	protein_coding	1.23371	4.79684e-06	7.18566e-05
ENSG00000146457	WTAP	protein_coding	1.3275	2.83697e-09	3.40375e-07
ENSG00000147416	ATP6V1B2	protein_coding	1.08972	5.91752e-09	5.21438e-07
ENSG00000147872	PLIN2	protein_coding	2.86643	2.38388e-14	4.46381e-11
ENSG00000148339	SLC25A25	protein_coding	1.11585	1.74552e-05	0.000196306
ENSG00000148572	NRBF2	protein_coding	1.03509	9.22793e-09	7.51274e-07
ENSG00000148841	ITPRIP	protein_coding	1.00714	1.38641e-07	4.99239e-06
ENSG00000149131	SERPING1	protein_coding	1.34078	0.000119539	0.000870117
ENSG00000149485	FADS1	protein_coding	1.55258	7.9617e-09	6.6259e-07
ENSG00000149948	HMGA2	protein_coding	1.28325	0.000216883	0.0013908
ENSG00000150630	VEGFC	protein_coding	1.4474	0.00206327	0.00832645
ENSG00000150991	UBC	protein_coding	1.20787	2.72064e-09	3.40375e-07
ENSG00000151012	SLC7A11	protein_coding	1.27479	1.00825e-05	0.00012778
ENSG00000151014	NOCT	protein_coding	1.80837	1.88843e-05	0.00020949
ENSG00000151136	BTBD11	protein_coding	1.52229	1.24777e-06	2.55349e-05
ENSG00000151617	EDNRA	protein_coding	1.26088	0.000405031	0.00226563
ENSG00000151790	TDO2	protein_coding	1.37223	1.90721e-06	3.56314e-05
ENSG00000152413	HOMER1	protein_coding	1.72445	7.77241e-05	0.000620632
ENSG00000153071	DAB2	protein_coding	1.07282	0.000330478	0.0019218
ENSG00000153879	CEBPG	protein_coding	1.35642	1.20061e-05	0.000147178
ENSG00000154451	GBP5	protein_coding	3.93634	3.12467e-07	8.89906e-06
ENSG00000154642	C21orf91	protein_coding	1.09227	2.74866e-05	0.000279721
ENSG00000155090	KLF10	protein_coding	1.28005	6.97246e-06	9.49522e-05
ENSG00000155287	SLC25A28	protein_coding	1.06897	3.61931e-06	5.80484e-05
ENSG00000155304	HSPA13	protein_coding	1.23078	1.11531e-07	4.32834e-06
ENSG00000155368	DBI	protein_coding	1.265	0.000340667	0.00197428
ENSG00000155380	SLC16A1	protein_coding	1.13848	2.81358e-07	8.29013e-06
ENSG00000156502	SUPV3L1	protein_coding	1.20268	4.9208e-07	1.24516e-05
ENSG00000156510	HKDC1	protein_coding	3.06159	8.26305e-05	0.00065285
ENSG00000156587	UBE2L6	protein_coding	1.64429	4.04644e-07	1.06343e-05
ENSG00000157557	ETS2	protein_coding	1.18567	2.88278e-06	4.83043e-05
ENSG00000157601	MX1	protein_coding	2.06568	2.53888e-08	1.61154e-06
ENSG00000158201	ABHD3	protein_coding	1.58139	0.000124786	0.000898697
ENSG00000159023	EPB41	protein_coding	1.01226	0.000156653	0.00107056
ENSG00000159399	HK2	protein_coding	2.48671	8.42588e-10	1.57775e-07
ENSG00000160213	CSTB	protein_coding	1.61163	0.00623205	0.0196622
ENSG00000160888	IER2	protein_coding	1.07072	7.78588e-06	0.000104136
ENSG00000161011	SQSTM1	protein_coding	1.39437	5.8215e-06	8.18068e-05
ENSG00000161813	LARP4	protein_coding	1.02579	1.31184e-07	4.81652e-06
ENSG00000162433	AK4	protein_coding	2.18741	8.08442e-07	1.8269e-05
ENSG00000162490	DRAXIN	protein_coding	1.34616	3.17807e-08	1.88918e-06
ENSG00000162645	GBP2	protein_coding	1.92105	1.06895e-05	0.000133284
ENSG00000162654	GBP4	protein_coding	3.90331	0.000248442	0.00154811
ENSG00000162772	ATF3	protein_coding	4.54754	2.08462e-15	7.80689e-12
ENSG00000163131	CTSS	protein_coding	6.27477	8.47968e-05	0.000666451
ENSG00000163162	RNF149	protein_coding	1.07763	1.10171e-06	2.32445e-05
ENSG00000163347	CLDN1	protein_coding	1.05395	0.000123	0.000890113
ENSG00000163565	IFI16	protein_coding	1.25161	2.93904e-08	1.77527e-06
ENSG00000163644	PPM1K	protein_coding	1.51682	3.5836e-08	2.00307e-06
ENSG00000163661	PTX3	protein_coding	1.39908	2.68212e-07	8.10045e-06
ENSG00000163814	CDCP1	protein_coding	2.05175	2.00431e-07	6.52708e-06
ENSG00000163840	DTX3L	protein_coding	1.72052	2.90282e-10	7.24738e-08
ENSG00000164164	OTUD4	protein_coding	1.02616	1.98024e-05	0.00021759
ENSG00000164171	ITGA2	protein_coding	2.11319	6.31499e-07	1.51116e-05
ENSG00000164211	STARD4	protein_coding	2.47205	2.69989e-12	2.52777e-09
ENSG00000164300	SERINC5	protein_coding	1.31473	6.65368e-11	2.00174e-08
ENSG00000164949	GEM	protein_coding	2.09955	1.10366e-07	4.30543e-06
ENSG00000165029	ABCA1	protein_coding	1.22527	5.00471e-09	4.76946e-07
ENSG00000165030	NFIL3	protein_coding	2.2657	6.63754e-13	8.28586e-10
ENSG00000165891	E2F7	protein_coding	2.01928	8.50921e-08	3.68404e-06
ENSG00000165949	IFI27	protein_coding	1.14919	0.00424584	0.0145145
ENSG00000165997	ARL5B	protein_coding	1.53793	5.09503e-06	7.4974e-05
ENSG00000166173	LARP6	protein_coding	1.15552	1.05216e-06	2.26304e-05
ENSG00000166401	SERPINB8	protein_coding	1.15764	3.20327e-07	8.98596e-06
ENSG00000166471	TMEM41B	protein_coding	1.60731	1.99789e-11	1.0884e-08
ENSG00000166575	TMEM135	protein_coding	1.04785	1.06665e-06	2.28263e-05
ENSG00000166750	SLFN5	protein_coding	1.65864	4.92348e-06	7.33138e-05
ENSG00000166825	ANPEP	protein_coding	1.96922	0.0134274	0.0361477
ENSG00000166889	PATL1	protein_coding	1.30497	9.9161e-09	7.98619e-07
ENSG00000167106	FAM102A	protein_coding	1.10094	0.000412546	0.00229056
ENSG00000167772	ANGPTL4	protein_coding	4.62536	5.03054e-09	4.76946e-07
ENSG00000167996	FTH1	protein_coding	1.24352	2.13054e-07	6.84882e-06
ENSG00000168003	SLC3A2	protein_coding	1.263	3.26219e-07	9.10549e-06
ENSG00000168062	BATF2	protein_coding	3.29054	1.04887e-05	0.000131372
ENSG00000168209	DDIT4	protein_coding	1.84142	1.70457e-08	1.18832e-06
ENSG00000168334	XIRP1	protein_coding	4.6956	0.00108874	0.00497537
ENSG00000168394	TAP1	protein_coding	2.34728	2.68626e-08	1.65819e-06
ENSG00000168917	SLC35G2	protein_coding	1.2461	1.29442e-05	0.000155672
ENSG00000168961	LGALS9	protein_coding	2.26268	4.71803e-06	7.11026e-05
ENSG00000169155	ZBTB43	protein_coding	1.2365	0.000219102	0.00140143
ENSG00000169245	CXCL10	protein_coding	5.66679	2.44081e-07	7.63944e-06
ENSG00000169248	CXCL11	protein_coding	5.18161	5.87876e-06	8.24567e-05
ENSG00000169359	SLC33A1	protein_coding	1.10963	5.35618e-09	4.77593e-07
ENSG00000170006	TMEM154	protein_coding	1.5108	9.25413e-06	0.000120207
ENSG00000170340	B3GNT2	protein_coding	1.23767	1.19286e-06	2.48181e-05
ENSG00000170385	SLC30A1	protein_coding	1.02884	8.68683e-06	0.000114654
ENSG00000170525	PFKFB3	protein_coding	1.2476	4.78531e-06	7.18276e-05
ENSG00000171310	CHST11	protein_coding	1.49248	6.64772e-08	3.11196e-06
ENSG00000171621	SPSB1	protein_coding	1.61658	6.0404e-05	0.000515879
ENSG00000172059	KLF11	protein_coding	1.50981	1.30288e-07	4.81652e-06
ENSG00000172216	CEBPB	protein_coding	1.41348	1.49538e-07	5.33352e-06
ENSG00000172893	DHCR7	protein_coding	1.56706	1.84344e-07	6.19164e-06
ENSG00000172936	MYD88	protein_coding	1.05213	3.92679e-07	1.04668e-05
ENSG00000173193	PARP14	protein_coding	2.11433	2.70092e-08	1.65819e-06
ENSG00000173221	GLRX	protein_coding	1.28728	2.38015e-06	4.14331e-05
ENSG00000173281	PPP1R3B	protein_coding	1.0844	0.000181435	0.00120668
ENSG00000173334	TRIB1	protein_coding	1.43617	1.30698e-06	2.65293e-05
ENSG00000173821	RNF213	protein_coding	1.12535	4.80453e-07	1.21986e-05
ENSG00000175197	DDIT3	protein_coding	2.67358	8.88939e-09	7.31665e-07
ENSG00000175592	FOSL1	protein_coding	2.00314	4.63179e-09	4.66673e-07
ENSG00000176171	BNIP3	protein_coding	1.49881	7.34189e-05	0.000593174
ENSG00000176887	SOX11	protein_coding	1.24177	3.7155e-05	0.000352713
ENSG00000176907	TCIM	protein_coding	2.66844	1.90074e-06	3.56314e-05
ENSG00000177150	FAM210A	protein_coding	1.33601	2.31836e-08	1.48415e-06
ENSG00000177294	FBXO39	protein_coding	2.29125	0.000816445	0.00393259
ENSG00000177409	SAMD9L	protein_coding	1.41043	0.000280342	0.00168791
ENSG00000177426	TGIF1	protein_coding	1.5243	3.21498e-12	2.67558e-09
ENSG00000177888	ZBTB41	protein_coding	1.30164	5.40973e-06	7.79284e-05
ENSG00000178860	MSC	protein_coding	1.87497	2.27436e-05	0.000243518
ENSG00000179918	SEPHS2	protein_coding	1.0299	1.27268e-09	1.98591e-07
ENSG00000181381	DDX60L	protein_coding	1.54226	1.47786e-06	2.91293e-05
ENSG00000183486	MX2	protein_coding	2.5186	0.000670329	0.00335837
ENSG00000184371	CSF1	protein_coding	1.89998	2.96647e-07	8.54571e-06
ENSG00000184557	SOCS3	protein_coding	2.6232	4.45808e-06	6.78679e-05
ENSG00000184979	USP18	protein_coding	2.33442	4.01041e-08	2.18074e-06
ENSG00000185022	MAFF	protein_coding	1.9424	6.1599e-08	2.98054e-06
ENSG00000185745	IFIT1	protein_coding	2.00006	7.59563e-08	3.42718e-06
ENSG00000185880	TRIM69	protein_coding	1.22132	1.22378e-09	1.98591e-07
ENSG00000185885	IFITM1	protein_coding	1.78054	0.00013658	0.000964172
ENSG00000185947	ZNF267	protein_coding	2.09274	1.01669e-07	4.15734e-06
ENSG00000186480	INSIG1	protein_coding	2.96458	2.59072e-10	6.69121e-08
ENSG00000187193	MT1X	protein_coding	1.25987	0.000495611	0.00263646
ENSG00000188313	PLSCR1	protein_coding	2.27299	5.17424e-09	4.77593e-07
ENSG00000196116	TDRD7	protein_coding	1.39309	9.90939e-07	2.16389e-05
ENSG00000196218	RYR1	protein_coding	2.65222	2.78029e-07	8.23099e-06
ENSG00000196611	MMP1	protein_coding	3.82468	9.36122e-06	0.000121307
ENSG00000196743	GM2A	protein_coding	1.94048	0.0169272	0.0432417
ENSG00000196843	ARID5A	protein_coding	1.23977	0.000722049	0.00355852
ENSG00000196954	CASP4	protein_coding	1.19165	0.0117698	0.0325539
ENSG00000197063	MAFG	protein_coding	1.0495	2.10058e-06	3.8334e-05
ENSG00000197930	ERO1A	protein_coding	1.25644	7.61849e-06	0.000102446
ENSG00000198431	TXNRD1	protein_coding	1.40034	4.04095e-07	1.06343e-05
ENSG00000198805	PNP	protein_coding	1.11037	1.91888e-05	0.000212296
ENSG00000198900	TOP1	protein_coding	1.33883	1.98488e-07	6.52708e-06
ENSG00000198911	SREBF2	protein_coding	1.31548	2.55926e-11	1.15817e-08
ENSG00000204267	TAP2	protein_coding	1.15262	0.000428514	0.00236171
ENSG00000205413	SAMD9	protein_coding	1.25991	1.35649e-05	0.000161536
ENSG00000213516	RBMXL1	protein_coding	1.2823	2.76066e-07	8.21777e-06
ENSG00000215472	RPL17-C18orf32	protein_coding	1.27191	7.3407e-07	1.68656e-05
ENSG00000216490	IFI30	protein_coding	4.86177	0.000186032	0.0012309
ENSG00000217128	FNIP1	protein_coding	1.02773	0.000172319	0.00115755
ENSG00000221963	APOL6	protein_coding	2.38802	2.63207e-07	8.04268e-06
ENSG00000223496	EXOSC6	protein_coding	1.23389	4.05502e-06	6.32752e-05
ENSG00000239713	APOBEC3G	protein_coding	1.44048	2.29057e-05	0.000244393
ENSG00000240065	PSMB9	protein_coding	1.23192	2.27791e-06	4.03346e-05
ENSG00000249992	TMEM158	protein_coding	1.66709	1.12539e-06	2.36774e-05
ENSG00000251201	TMED7-TICAM2	protein_coding	1.08351	7.8753e-05	0.000627511
ENSG00000251349	MSANTD3-TMEFF1	protein_coding	1.02711	3.09131e-05	0.000305461
ENSG00000253276	CCDC71L	protein_coding	1.05064	0.000419115	0.00231844
ENSG00000271303	SRXN1	protein_coding	1.73074	2.38263e-11	1.15817e-08
ENSG00000280987		protein_coding	1.52832	2.82241e-07	8.29013e-06
ENSG00000200320	SNORA63	snoRNA	5.01122	0.00907141	0.0265447
ENSG00000279267		TEC	1.15059	1.20972e-06	2.50197e-05
ENSG00000225492	GBP1P1	transcribed_unprocessed_pseudogene	5.27721	0.000105686	0.000793251

## Sheet: PA-DEG_down
gene_id	PAvsVH_symbol	PAvsVH_biotype	PAvsVH_logFC	PAvsVH_PValue	PAvsVH_FDR
ENSG00000162614	NEXN	protein_coding	-1.86389	1.34627e-12	1.44051e-09
ENSG00000166997	CNPY4	protein_coding	-1.2125	3.53909e-11	1.4429e-08
ENSG00000163431	LMOD1	protein_coding	-2.51575	2.57445e-10	6.69121e-08
ENSG00000151572	ANO4	protein_coding	-1.36446	7.00372e-10	1.34507e-07
ENSG00000198796	ALPK2	protein_coding	-1.3175	5.04929e-11	1.80091e-08
ENSG00000165996	HACD1	protein_coding	-1.31513	1.18803e-10	3.42245e-08
ENSG00000197043	ANXA6	protein_coding	-1.25541	5.30706e-09	4.77593e-07
ENSG00000019144	PHLDB1	protein_coding	-1.53088	1.52065e-09	2.32442e-07
ENSG00000166452	AKIP1	protein_coding	-1.37604	1.14495e-09	1.90571e-07
ENSG00000167693	NXN	protein_coding	-1.54003	2.10188e-09	2.86237e-07
ENSG00000168386	FILIP1L	protein_coding	-1.51666	4.0135e-09	4.23396e-07
ENSG00000159176	CSRP1	protein_coding	-1.1134	4.58092e-08	2.39938e-06
ENSG00000092969	TGFB2	protein_coding	-1.14529	2.90841e-09	3.40375e-07
ENSG00000128606	LRRC17	protein_coding	-1.42261	4.76786e-09	4.69886e-07
ENSG00000140682	TGFB1I1	protein_coding	-1.35711	1.23181e-08	9.22624e-07
ENSG00000131788	PIAS3	protein_coding	-1.17326	1.33069e-08	9.77147e-07
ENSG00000149582	TMEM25	protein_coding	-1.23919	1.05836e-07	4.21656e-06
ENSG00000005882	PDK2	protein_coding	-1.34242	2.37592e-09	3.12205e-07
ENSG00000174099	MSRB3	protein_coding	-1.00514	1.41354e-08	1.021e-06
ENSG00000138629	UBL7	protein_coding	-1.28076	5.20417e-08	2.64335e-06
ENSG00000082497	SERTAD4	protein_coding	-1.85254	1.46422e-08	1.03462e-06
ENSG00000130176	CNN1	protein_coding	-1.16954	7.38093e-08	3.3505e-06
ENSG00000141736	ERBB2	protein_coding	-1.23332	8.80663e-08	3.7909e-06
ENSG00000159251	ACTC1	protein_coding	-2.06039	1.86474e-08	1.24704e-06
ENSG00000197217	ENTPD4	protein_coding	-1.19651	1.07486e-08	8.38614e-07
ENSG00000198892	SHISA4	protein_coding	-1.21032	6.40052e-08	3.0535e-06
ENSG00000115129	TP53I3	protein_coding	-1.49932	3.62821e-07	9.918e-06
ENSG00000182054	IDH2	protein_coding	-1.28825	1.07827e-07	4.27316e-06
ENSG00000125378	BMP4	protein_coding	-1.49386	5.6922e-08	2.8423e-06
ENSG00000197879	MYO1C	protein_coding	-1.17161	5.61116e-07	1.37345e-05
ENSG00000134198	TSPAN2	protein_coding	-1.573	2.26551e-08	1.46282e-06
ENSG00000081791	DELE1	protein_coding	-1.46706	8.20266e-07	1.84498e-05
ENSG00000064666	CNN2	protein_coding	-1.53699	7.43183e-07	1.69709e-05
ENSG00000146063	TRIM41	protein_coding	-1.23155	1.01347e-06	2.20666e-05
ENSG00000100196	KDELR3	protein_coding	-1.66176	2.08031e-07	6.74524e-06
ENSG00000278615	C11orf98	protein_coding	-1.00885	7.2783e-08	3.32837e-06
ENSG00000177951	BET1L	protein_coding	-1.20865	1.12885e-07	4.3583e-06
ENSG00000157570	TSPAN18	protein_coding	-1.77272	2.76486e-07	8.21777e-06
ENSG00000111077	TNS2	protein_coding	-2.44895	1.04162e-07	4.21133e-06
ENSG00000213676	ATF6B	protein_coding	-1.11421	2.89674e-06	4.84298e-05
ENSG00000240771	ARHGEF25	protein_coding	-1.06203	1.5229e-07	5.34241e-06
ENSG00000099949	LZTR1	protein_coding	-1.0588	5.74325e-07	1.39375e-05
ENSG00000138131	LOXL4	protein_coding	-1.04257	1.0984e-06	2.32401e-05
ENSG00000140416	TPM1	protein_coding	-1.17472	2.10821e-06	3.8334e-05
ENSG00000168101	NUDT16L1	protein_coding	-1.61299	5.6382e-07	1.37557e-05
ENSG00000204843	DCTN1	protein_coding	-1.14126	1.88932e-06	3.56314e-05
ENSG00000107796	ACTA2	protein_coding	-1.26696	8.09788e-07	1.8269e-05
ENSG00000128510	CPA4	protein_coding	-1.42284	1.82419e-07	6.15459e-06
ENSG00000143224	PPOX	protein_coding	-1.39868	1.99145e-07	6.52708e-06
ENSG00000156990	RPUSD3	protein_coding	-1.24418	6.334e-06	8.76925e-05
ENSG00000104044	OCA2	protein_coding	-1.48583	3.69579e-05	0.000351734
ENSG00000186834	HEXIM1	protein_coding	-1.1444	6.70023e-07	1.57319e-05
ENSG00000067836	ROGDI	protein_coding	-1.79615	1.18833e-06	2.47927e-05
ENSG00000197256	KANK2	protein_coding	-1.09764	1.07827e-06	2.29439e-05
ENSG00000150764	DIXDC1	protein_coding	-1.31536	3.91431e-06	6.15928e-05
ENSG00000113108	APBB3	protein_coding	-1.12711	7.55687e-07	1.71518e-05
ENSG00000110237	ARHGEF17	protein_coding	-1.70781	3.12477e-07	8.89906e-06
ENSG00000100100	PIK3IP1	protein_coding	-1.23742	8.01484e-06	0.000106817
ENSG00000024422	EHD2	protein_coding	-1.72626	2.14308e-06	3.84931e-05
ENSG00000075461	CACNG4	protein_coding	-1.56294	1.44011e-06	2.85354e-05
ENSG00000136877	FPGS	protein_coding	-1.05161	5.58285e-06	7.94972e-05
ENSG00000198753	PLXNB3	protein_coding	-1.61575	3.27019e-07	9.10549e-06
ENSG00000161010	MRNIP	protein_coding	-1.97736	7.26669e-07	1.67469e-05
ENSG00000172830	SSH3	protein_coding	-1.53218	1.51964e-06	2.97183e-05
ENSG00000196411	EPHB4	protein_coding	-1.12678	2.39535e-06	4.14331e-05
ENSG00000262814	MRPL12	protein_coding	-1.09459	1.89072e-05	0.00020949
ENSG00000137801	THBS1	protein_coding	-1.44308	8.81778e-07	1.95966e-05
ENSG00000123374	CDK2	protein_coding	-1.05793	8.7038e-06	0.000114654
ENSG00000213977	TAX1BP3	protein_coding	-1.29508	5.04817e-06	7.44306e-05
ENSG00000100968	NFATC4	protein_coding	-1.55386	5.15435e-06	7.55501e-05
ENSG00000104884	ERCC2	protein_coding	-1.32774	8.34091e-06	0.000110377
ENSG00000185909	KLHDC8B	protein_coding	-1.15941	1.40834e-06	2.80544e-05
ENSG00000135437	RDH5	protein_coding	-1.40826	5.73825e-06	8.09407e-05
ENSG00000074071	MRPS34	protein_coding	-1.06459	2.5071e-05	0.000261171
ENSG00000044090	CUL7	protein_coding	-1.02453	3.2261e-06	5.28742e-05
ENSG00000073050	XRCC1	protein_coding	-1.00244	2.50099e-05	0.000260897
ENSG00000153406	NMRAL1	protein_coding	-1.22946	2.63021e-05	0.000270236
ENSG00000124574	ABCC10	protein_coding	-1.35816	1.04156e-05	0.000131347
ENSG00000137267	TUBB2A	protein_coding	-1.20625	2.42076e-05	0.000254298
ENSG00000173914	RBM4B	protein_coding	-1.01257	6.20575e-05	0.000524617
ENSG00000159792	PSKH1	protein_coding	-1.22058	2.11167e-05	0.000230123
ENSG00000173559	NABP1	protein_coding	-1.01477	3.5835e-06	5.77213e-05
ENSG00000178922	HYI	protein_coding	-1.13374	3.09104e-05	0.000305461
ENSG00000163251	FZD5	protein_coding	-1.06052	2.89281e-05	0.000290056
ENSG00000144057	ST6GAL2	protein_coding	-2.14231	3.14023e-06	5.1807e-05
ENSG00000161981	SNRNP25	protein_coding	-1.153	2.3272e-06	4.09171e-05
ENSG00000162458	FBLIM1	protein_coding	-1.20645	6.79413e-06	9.35442e-05
ENSG00000158321	AUTS2	protein_coding	-1.09582	2.82551e-06	4.76645e-05
ENSG00000138772	ANXA3	protein_coding	-1.02864	3.80196e-06	6.02044e-05
ENSG00000167100	SAMD14	protein_coding	-1.68072	2.73486e-05	0.000279074
ENSG00000173992	CCS	protein_coding	-1.42835	2.95774e-05	0.000294981
ENSG00000077092	RARB	protein_coding	-1.49105	1.18517e-05	0.000146002
ENSG00000108819	PPP1R9B	protein_coding	-1.14557	6.44456e-05	0.000539327
ENSG00000166165	CKB	protein_coding	-1.54939	1.23769e-05	0.000150736
ENSG00000130827	PLXNA3	protein_coding	-1.30011	1.38063e-05	0.000163622
ENSG00000187838	PLSCR3	protein_coding	-1.06107	1.80859e-05	0.00020279
ENSG00000196642	RABL6	protein_coding	-1.26102	0.000109399	0.000812896
ENSG00000175906	ARL4D	protein_coding	-1.29779	1.42366e-05	0.000166874
ENSG00000241852	C8orf58	protein_coding	-1.48927	8.33921e-06	0.000110377
ENSG00000196923	PDLIM7	protein_coding	-2.3648	1.34967e-05	0.000161229
ENSG00000128159	TUBGCP6	protein_coding	-1.69576	1.06947e-05	0.000133284
ENSG00000154096	THY1	protein_coding	-1.2029	1.98126e-05	0.00021759
ENSG00000112559	MDFI	protein_coding	-1.66904	2.56633e-05	0.000265148
ENSG00000198276	UCKL1	protein_coding	-1.75402	1.94176e-05	0.00021451
ENSG00000101473	ACOT8	protein_coding	-1.01263	9.79141e-05	0.000754992
ENSG00000134330	IAH1	protein_coding	-1.0479	0.000424194	0.00234135
ENSG00000160613	PCSK7	protein_coding	-1.33448	2.34728e-05	0.000247971
ENSG00000086991	NOX4	protein_coding	-1.71453	5.70168e-06	8.07289e-05
ENSG00000175662	TOM1L2	protein_coding	-1.04839	3.31917e-05	0.000323285
ENSG00000137124	ALDH1B1	protein_coding	-1.15423	3.74787e-05	0.000355336
ENSG00000187325	TAF9B	protein_coding	-1.1201	4.32031e-05	0.000398021
ENSG00000082014	SMARCD3	protein_coding	-1.12936	9.09725e-06	0.000118855
ENSG00000139174	PRICKLE1	protein_coding	-1.14019	2.37435e-05	0.000249773
ENSG00000157404	KIT	protein_coding	-1.43401	3.74278e-06	5.9519e-05
ENSG00000172732	MUS81	protein_coding	-1.02777	0.000198186	0.00129192
ENSG00000141295	SCRN2	protein_coding	-1.35882	0.000117142	0.000858506
ENSG00000139625	MAP3K12	protein_coding	-1.31749	2.74771e-05	0.000279721
ENSG00000164050	PLXNB1	protein_coding	-1.00188	4.55325e-05	0.000413882
ENSG00000108528	SLC25A11	protein_coding	-1.16806	0.000121864	0.0008836
ENSG00000267645		protein_coding	-1.23685	0.000249374	0.00155143
ENSG00000117318	ID3	protein_coding	-1.7242	5.17422e-05	0.000459182
ENSG00000140937	CDH11	protein_coding	-1.18679	1.27776e-05	0.000154361
ENSG00000137285	TUBB2B	protein_coding	-1.24272	4.37718e-05	0.000402271
ENSG00000159423	ALDH4A1	protein_coding	-1.32175	0.000232837	0.00146732
ENSG00000100417	PMM1	protein_coding	-1.13489	3.69236e-05	0.000351734
ENSG00000172992	DCAKD	protein_coding	-1.14858	1.25567e-05	0.00015243
ENSG00000100242	SUN2	protein_coding	-1.3606	0.000177372	0.00118512
ENSG00000027847	B4GALT7	protein_coding	-1.15773	0.000117756	0.000860483
ENSG00000105520	PLPPR2	protein_coding	-1.13304	1.66017e-05	0.000187835
ENSG00000178882	RFLNA	protein_coding	-1.90446	1.3169e-05	0.00015793
ENSG00000103202	NME4	protein_coding	-1.11124	0.000155974	0.00106689
ENSG00000103502	CDIPT	protein_coding	-1.12197	0.000227181	0.00144202
ENSG00000154545	MAGED4	protein_coding	-1.4489	7.66884e-05	0.000614327
ENSG00000065308	TRAM2	protein_coding	-1.11223	1.67699e-05	0.000189452
ENSG00000105655	ISYNA1	protein_coding	-1.44208	0.000145053	0.00101065
ENSG00000149761	NUDT22	protein_coding	-1.1793	2.5373e-05	0.000263726
ENSG00000007866	TEAD3	protein_coding	-1.05931	1.55527e-05	0.000179215
ENSG00000169184	MN1	protein_coding	-1.44017	2.459e-05	0.000257234
ENSG00000160783	PMF1	protein_coding	-1.08354	6.83224e-05	0.000562964
ENSG00000183779	ZNF703	protein_coding	-1.04079	0.000180139	0.00120039
ENSG00000134508	CABLES1	protein_coding	-1.14858	9.12437e-06	0.000118855
ENSG00000166106	ADAMTS15	protein_coding	-1.42706	0.000134596	0.000957382
ENSG00000198467	TPM2	protein_coding	-1.10309	0.000285714	0.00171474
ENSG00000078401	EDN1	protein_coding	-1.54873	8.19215e-06	0.000108986
ENSG00000162032	SPSB3	protein_coding	-1.6364	0.000167875	0.0011338
ENSG00000169169	CPT1C	protein_coding	-1.23583	6.80855e-05	0.000561839
ENSG00000127419	TMEM175	protein_coding	-1.42554	0.000105696	0.000793251
ENSG00000132535	DLG4	protein_coding	-1.15483	3.45049e-05	0.000332802
ENSG00000175745	NR2F1	protein_coding	-1.22165	6.73945e-05	0.000558391
ENSG00000125520	SLC2A4RG	protein_coding	-1.43266	0.000199995	0.00130128
ENSG00000166002	SMCO4	protein_coding	-1.15196	0.000119078	0.000867599
ENSG00000171130	ATP6V0E2	protein_coding	-1.07534	0.000452795	0.00245046
ENSG00000149499	EML3	protein_coding	-1.11639	1.48495e-05	0.000172172
ENSG00000149782	PLCB3	protein_coding	-1.26891	5.5429e-05	0.000484438
ENSG00000142303	ADAMTS10	protein_coding	-1.96187	2.22441e-05	0.000239724
ENSG00000177106	EPS8L2	protein_coding	-1.33598	4.76049e-05	0.000427531
ENSG00000188130	MAPK12	protein_coding	-1.52226	0.000252984	0.00156599
ENSG00000141258	SGSM2	protein_coding	-1.04312	0.000232126	0.00146656
ENSG00000173581	CCDC106	protein_coding	-1.20431	0.000128417	0.000918663
ENSG00000118523	CCN2	protein_coding	-1.13489	4.05098e-05	0.000376464
ENSG00000148341	SH3GLB2	protein_coding	-1.2054	0.000132425	0.000943736
ENSG00000090238	YPEL3	protein_coding	-1.49404	5.48295e-05	0.000480881
ENSG00000100379	KCTD17	protein_coding	-1.05891	5.85911e-05	0.000504422
ENSG00000119699	TGFB3	protein_coding	-1.6365	4.0192e-05	0.000374425
ENSG00000090097	PCBP4	protein_coding	-1.0051	0.000470093	0.00252998
ENSG00000136490	LIMD2	protein_coding	-1.40244	0.000122662	0.000888529
ENSG00000267368	UPK3BL1	protein_coding	-1.4537	0.000101409	0.000774262
ENSG00000205572	SERF1B	protein_coding	-1.5112	7.27926e-06	9.85925e-05
ENSG00000099899	TRMT2A	protein_coding	-1.37765	0.000242645	0.00151704
ENSG00000149809	TM7SF2	protein_coding	-1.10479	0.000859881	0.00408921
ENSG00000211450	SELENOH	protein_coding	-1.17173	4.39354e-05	0.000402786
ENSG00000079257	LXN	protein_coding	-1.1985	2.82397e-05	0.000285446
ENSG00000123933	MXD4	protein_coding	-1.23959	0.000130731	0.000933438
ENSG00000171992	SYNPO	protein_coding	-1.41407	6.87651e-05	0.000564748
ENSG00000179526	SHARPIN	protein_coding	-1.21919	0.00118789	0.00532308
ENSG00000215440	NPEPL1	protein_coding	-1.25016	0.000211654	0.00136535
ENSG00000072163	LIMS2	protein_coding	-1.9946	0.000147755	0.00102376
ENSG00000099203	TMED1	protein_coding	-1.15276	0.000594831	0.00307049
ENSG00000135723	FHOD1	protein_coding	-1.19828	0.000193865	0.00127111
ENSG00000136153	LMO7	protein_coding	-1.52362	6.30424e-05	0.000531145
ENSG00000169718	DUS1L	protein_coding	-1.01519	0.000179428	0.00119672
ENSG00000173442	EHBP1L1	protein_coding	-1.02408	0.000235186	0.0014778
ENSG00000176720	BOK	protein_coding	-1.39696	0.000356224	0.00204454
ENSG00000124067	SLC12A4	protein_coding	-1.08435	6.86521e-05	0.000564439
ENSG00000180340	FZD2	protein_coding	-1.25216	9.08957e-05	0.000709176
ENSG00000139998	RAB15	protein_coding	-1.01267	9.64172e-05	0.000745268
ENSG00000213983	AP1G2	protein_coding	-1.55219	0.000155313	0.00106334
ENSG00000141858	SAMD1	protein_coding	-1.2112	0.000277429	0.00167441
ENSG00000010295	IFFO1	protein_coding	-1.15426	0.000223957	0.00142777
ENSG00000103266	STUB1	protein_coding	-1.02259	0.00167405	0.00699311
ENSG00000120913	PDLIM2	protein_coding	-1.76694	0.00118772	0.00532308
ENSG00000132613	MTSS2	protein_coding	-1.09645	0.000703014	0.00348001
ENSG00000213722	DDAH2	protein_coding	-1.25496	0.00108054	0.00494395
ENSG00000160094	ZNF362	protein_coding	-1.14324	0.000613948	0.00314318
ENSG00000196700	ZNF512B	protein_coding	-1.20841	0.000406564	0.00227082
ENSG00000066468	FGFR2	protein_coding	-1.23201	9.12435e-05	0.000710409
ENSG00000106330	MOSPD3	protein_coding	-1.13052	5.781e-05	0.000503485
ENSG00000125995	ROMO1	protein_coding	-1.31954	0.00200138	0.00810287
ENSG00000138771	SHROOM3	protein_coding	-1.2166	0.000391636	0.00220222
ENSG00000176973	FAM89B	protein_coding	-1.28316	0.00109027	0.00497807
ENSG00000185504	FAAP100	protein_coding	-1.88233	0.000322632	0.00189626
ENSG00000124006	OBSL1	protein_coding	-1.28194	0.000169889	0.00114533
ENSG00000171680	PLEKHG5	protein_coding	-1.2735	9.54961e-05	0.000738911
ENSG00000103148	NPRL3	protein_coding	-1.09	0.000389892	0.00219736
ENSG00000138650	PCDH10	protein_coding	-1.27569	0.000105129	0.000792969
ENSG00000104835	SARS2	protein_coding	-1.4686	0.000211821	0.00136535
ENSG00000079462	PAFAH1B3	protein_coding	-1.01605	0.00164186	0.0068778
ENSG00000126456	IRF3	protein_coding	-1.0375	0.000250085	0.00155318
ENSG00000261236	BOP1	protein_coding	-1.60688	0.000885009	0.00417426
ENSG00000076928	ARHGEF1	protein_coding	-1.48057	0.000188005	0.00124176
ENSG00000113758	DBN1	protein_coding	-1.34243	0.000241478	0.00151226
ENSG00000158863	FHIP2B	protein_coding	-1.25049	0.000254388	0.0015695
ENSG00000002330	BAD	protein_coding	-1.11922	0.00140448	0.00610538
ENSG00000072195	SPEG	protein_coding	-1.0237	0.00056813	0.00295097
ENSG00000122515	ZMIZ2	protein_coding	-1.13944	0.000247453	0.00154323
ENSG00000204681	GABBR1	protein_coding	-1.12801	0.000141294	0.000988132
ENSG00000128283	CDC42EP1	protein_coding	-1.66634	0.000565238	0.00294207
ENSG00000007541	PIGQ	protein_coding	-1.3818	0.00050848	0.00269534
ENSG00000183840	GPR39	protein_coding	-1.3085	0.00010959	0.00081312
ENSG00000111678	C12orf57	protein_coding	-1.2435	0.00561184	0.0180923
ENSG00000197948	FCHSD1	protein_coding	-1.11328	0.000672516	0.00336708
ENSG00000100314	CABP7	protein_coding	-1.0715	0.000476487	0.00255834
ENSG00000146830	GIGYF1	protein_coding	-1.08948	0.000902569	0.00424106
ENSG00000169100	SLC25A6	protein_coding	-1.03486	0.00577651	0.0185214
ENSG00000119280	C1orf198	protein_coding	-1.04903	0.000127703	0.000914659
ENSG00000173531	MST1	protein_coding	-1.23761	0.000268515	0.00163113
ENSG00000171163	ZNF692	protein_coding	-1.24599	6.60989e-05	0.000550089
ENSG00000149823	VPS51	protein_coding	-1.28212	0.000899319	0.00422843
ENSG00000090924	PLEKHG2	protein_coding	-1.38733	1.63371e-05	0.000185682
ENSG00000146067	FAM193B	protein_coding	-1.00524	0.000281089	0.00169105
ENSG00000130787	HIP1R	protein_coding	-1.36451	0.000323199	0.00189626
ENSG00000213445	SIPA1	protein_coding	-1.3896	0.000273127	0.00164977
ENSG00000149212	SESN3	protein_coding	-1.19526	0.000605494	0.00311266
ENSG00000061938	TNK2	protein_coding	-1.04006	0.000260779	0.00159448
ENSG00000169727	GPS1	protein_coding	-1.11442	0.00229626	0.00900471
ENSG00000165915	SLC39A13	protein_coding	-1.45412	0.0013986	0.00608336
ENSG00000131899	LLGL1	protein_coding	-1.09417	0.00151228	0.00644676
ENSG00000007080	CCDC124	protein_coding	-1.07889	0.00695941	0.0214599
ENSG00000157637	SLC38A10	protein_coding	-1.04518	0.00371123	0.0130258
ENSG00000101940	WDR13	protein_coding	-1.11583	0.00198939	0.00808055
ENSG00000090565	RAB11FIP3	protein_coding	-1.05579	0.000194063	0.00127111
ENSG00000130733	YIPF2	protein_coding	-1.02028	0.00316165	0.0114455
ENSG00000175482	POLD4	protein_coding	-1.32891	0.00188718	0.00773089
ENSG00000124920	MYRF	protein_coding	-1.62948	0.000403671	0.0022631
ENSG00000125652	ALKBH7	protein_coding	-1.13531	0.00532018	0.0174314
ENSG00000115318	LOXL3	protein_coding	-1.02791	0.00121543	0.00542523
ENSG00000167645	YIF1B	protein_coding	-1.06433	0.00206895	0.00834037
ENSG00000126903	SLC10A3	protein_coding	-1.17114	0.00141755	0.0061408
ENSG00000146826	TRAPPC14	protein_coding	-1.02808	0.000696243	0.00345355
ENSG00000144476	ACKR3	protein_coding	-1.0441	0.00429399	0.0146324
ENSG00000168273	SMIM4	protein_coding	-1.25967	0.00023293	0.00146732
ENSG00000101104	PABPC1L	protein_coding	-1.39074	0.000109797	0.000813432
ENSG00000101335	MYL9	protein_coding	-1.08282	0.00184149	0.00758263
ENSG00000151366	NDUFC2	protein_coding	-1.00395	0.00280192	0.0104891
ENSG00000140983	RHOT2	protein_coding	-1.11055	0.000450694	0.00244085
ENSG00000215788	TNFRSF25	protein_coding	-1.60675	0.000723686	0.00356371
ENSG00000213339	QTRT1	protein_coding	-1.265	0.00208181	0.00836971
ENSG00000148362	PAXX	protein_coding	-1.15376	0.00401955	0.0139028
ENSG00000154134	ROBO3	protein_coding	-1.16994	0.000950987	0.00443518
ENSG00000132329	RAMP1	protein_coding	-1.22336	0.00275174	0.0103467
ENSG00000165912	PACSIN3	protein_coding	-1.15269	0.00350198	0.0124785
ENSG00000177666	PNPLA2	protein_coding	-1.39255	0.000862777	0.00409
ENSG00000077454	LRCH4	protein_coding	-1.34363	0.00131704	0.00578911
ENSG00000177697	CD151	protein_coding	-1.02026	0.00270181	0.0101896
ENSG00000105255	FSD1	protein_coding	-1.02585	0.00251717	0.00962264
ENSG00000114923	SLC4A3	protein_coding	-1.33867	0.0018685	0.00768117
ENSG00000100429	HDAC10	protein_coding	-1.59134	0.00179542	0.00741329
ENSG00000164880	INTS1	protein_coding	-1.3706	0.00352261	0.012519
ENSG00000133243	BTBD2	protein_coding	-1.09445	0.00484643	0.0161261
ENSG00000105419	MEIS3	protein_coding	-1.37441	0.000504424	0.0026771
ENSG00000177576	C18orf32	protein_coding	-1.59466	0.000132983	0.000946807
ENSG00000171914	TLN2	protein_coding	-1.0737	0.00157704	0.00667345
ENSG00000135362	PRR5L	protein_coding	-1.05094	0.000521724	0.00275514
ENSG00000075618	FSCN1	protein_coding	-1.22711	0.00309623	0.0112686
ENSG00000174886	NDUFA11	protein_coding	-1.12106	0.0172866	0.0440697
ENSG00000167543	TP53I13	protein_coding	-1.23691	0.00744734	0.0227305
ENSG00000145632	PLK2	protein_coding	-1.17741	0.000585159	0.00302891
ENSG00000100065	CARD10	protein_coding	-1.54121	0.00246941	0.00948508
ENSG00000142327	RNPEPL1	protein_coding	-1.28254	0.00285681	0.0106508
ENSG00000179271	GADD45GIP1	protein_coding	-1.02792	0.00608486	0.0192953
ENSG00000162337	LRP5	protein_coding	-1.27983	0.00426122	0.0145339
ENSG00000105137	SYDE1	protein_coding	-1.12011	0.000379176	0.00214342
ENSG00000182809	CRIP2	protein_coding	-1.72348	0.00287997	0.0107111
ENSG00000177595	PIDD1	protein_coding	-1.62128	0.00280223	0.0104891
ENSG00000179085	DPM3	protein_coding	-1.19678	0.0120777	0.0332443
ENSG00000158373	H2BC5	protein_coding	-1.3373	0.000303839	0.00180902
ENSG00000126458	RRAS	protein_coding	-1.11532	0.00952574	0.0274732
ENSG00000071894	CPSF1	protein_coding	-1.31903	0.00298953	0.0109904
ENSG00000152154	TMEM178A	protein_coding	-1.48953	0.00146854	0.00631784
ENSG00000146540	C7orf50	protein_coding	-1.34874	0.00686193	0.0212117
ENSG00000162076	FLYWCH2	protein_coding	-1.17325	0.00598799	0.0190285
ENSG00000099864	PALM	protein_coding	-1.37197	0.00746864	0.0227769
ENSG00000005206	SPPL2B	protein_coding	-1.29961	0.00178953	0.00739305
ENSG00000275342	PRAG1	protein_coding	-1.08719	0.00247452	0.00949983
ENSG00000173801	JUP	protein_coding	-1.03034	0.00352337	0.012519
ENSG00000172663	TMEM134	protein_coding	-1.00534	0.0102429	0.0291156
ENSG00000125611	CHCHD5	protein_coding	-1.05101	0.0199694	0.0493122
ENSG00000183963	SMTN	protein_coding	-1.09912	0.00157519	0.00666942
ENSG00000206538	VGLL3	protein_coding	-1.44888	0.000847414	0.00404534
ENSG00000107404	DVL1	protein_coding	-1.67371	0.00351352	0.0124958
ENSG00000177700	POLR2L	protein_coding	-1.45856	0.0037798	0.0131923
ENSG00000100918	REC8	protein_coding	-1.27734	0.00083151	0.00398988
ENSG00000167657	DAPK3	protein_coding	-1.03384	0.00323248	0.0116568
ENSG00000160360	GPSM1	protein_coding	-1.37603	0.00261703	0.00993992
ENSG00000128311	TST	protein_coding	-1.00743	0.00285097	0.0106373
ENSG00000109736	MFSD10	protein_coding	-1.44464	0.00483801	0.0161052
ENSG00000138798	EGF	protein_coding	-1.69686	0.00063464	0.0032191
ENSG00000128309	MPST	protein_coding	-1.25139	0.0045062	0.0151896
ENSG00000159069	FBXW5	protein_coding	-1.0422	0.0154199	0.0401442
ENSG00000172725	CORO1B	protein_coding	-1.03274	0.0113289	0.0315909
ENSG00000213398	LCAT	protein_coding	-1.32893	0.000808228	0.00390557
ENSG00000103168	TAF1C	protein_coding	-1.0297	0.0020837	0.0083728
ENSG00000106211	HSPB1	protein_coding	-1.48483	0.0117563	0.0325404
ENSG00000177225	GATD1	protein_coding	-1.06113	0.00296569	0.0109478
ENSG00000167969	ECI1	protein_coding	-1.31517	0.0113889	0.0317464
ENSG00000175221	MED16	protein_coding	-1.18782	0.0115309	0.0320351
ENSG00000148677	ANKRD1	protein_coding	-1.04272	0.00302605	0.0110724
ENSG00000164877	MICALL2	protein_coding	-1.30231	0.0041135	0.014149
ENSG00000187244	BCAM	protein_coding	-1.10642	0.0128634	0.0349153
ENSG00000099904	ZDHHC8	protein_coding	-1.01529	0.00537343	0.0175543
ENSG00000001617	SEMA3F	protein_coding	-1.08009	0.00124311	0.00552246
ENSG00000138080	EMILIN1	protein_coding	-1.19859	0.00757643	0.0230493
ENSG00000180332	KCTD4	protein_coding	-1.14165	0.00161892	0.00680072
ENSG00000071655	MBD3	protein_coding	-1.14095	0.00609828	0.0193297
ENSG00000182154	MRPL41	protein_coding	-1.39633	0.00701656	0.0216183
ENSG00000131584	ACAP3	protein_coding	-1.0588	0.00566936	0.0182169
ENSG00000125968	ID1	protein_coding	-1.43217	0.00372536	0.0130632
ENSG00000164932	CTHRC1	protein_coding	-1.2304	0.0036342	0.0128276
ENSG00000184897	H1-10	protein_coding	-1.13429	0.0203969	0.0499748
ENSG00000181029	TRAPPC5	protein_coding	-1.3871	0.0184092	0.0462857
ENSG00000164897	TMUB1	protein_coding	-1.08146	0.0152884	0.039899
ENSG00000139631	CSAD	protein_coding	-1.10051	0.00237496	0.00922767
ENSG00000130702	LAMA5	protein_coding	-1.20901	0.00972589	0.0279214
ENSG00000140859	KIFC3	protein_coding	-1.02111	0.00799605	0.0239735
ENSG00000162585	FAAP20	protein_coding	-1.11059	0.0176238	0.0447465
ENSG00000163017	ACTG2	protein_coding	-1.15334	0.0128591	0.0349153
ENSG00000134030	CTIF	protein_coding	-1.06905	0.0120816	0.0332443
ENSG00000126603	GLIS2	protein_coding	-1.14365	0.0173541	0.0442117
ENSG00000111186	WNT5B	protein_coding	-1.60651	0.00497599	0.0164912
ENSG00000135480	KRT7	protein_coding	-1.71864	0.0143506	0.037981
ENSG00000100258	LMF2	protein_coding	-1.12951	0.0171043	0.0436494
ENSG00000006016	CRLF1	protein_coding	-1.04535	0.0111744	0.0312651
ENSG00000065054	SLC9A3R2	protein_coding	-1.41854	0.0108268	0.0305089
ENSG00000107281	NPDC1	protein_coding	-1.07102	0.0113037	0.0315325
ENSG00000171345	KRT19	protein_coding	-1.35372	0.012487	0.0341217
ENSG00000177519	RPRM	protein_coding	-1.12145	0.0195394	0.0484764
ENSG00000173465	ZNRD2	protein_coding	-1.318	0.0147752	0.0388167
ENSG00000142552	RCN3	protein_coding	-1.0535	0.0137249	0.0367768
ENSG00000145721	LIX1	protein_coding	-1.13792	0.0192363	0.047899
ENSG00000156466	GDF6	protein_coding	-1.59243	0.00946593	0.0273342
ENSG00000188549	CCDC9B	protein_coding	-1.14511	1.05463e-07	4.21656e-06
ENSG00000205726	ITSN1	protein_coding	-1.07934	3.44451e-07	9.48508e-06
ENSG00000121716	PILRB	protein_coding	-1.15325	4.18194e-05	0.000386223
ENSG00000253250	C8orf88	protein_coding	-1.057	7.17326e-05	0.000584632
ENSG00000039650	PNKP	protein_coding	-1.05984	0.000138411	0.000971835
ENSG00000104936	DMPK	protein_coding	-1.32179	0.000142381	0.000993877
ENSG00000169857	AVEN	protein_coding	-1.10361	0.000148487	0.00102788
ENSG00000185499	MUC1	protein_coding	-1.02832	0.000236679	0.0014847
ENSG00000140400	MAN2C1	protein_coding	-1.05228	0.000256976	0.00158026
ENSG00000169992	NLGN2	protein_coding	-1.00818	0.000332976	0.00193183
ENSG00000196123	KIAA0895L	protein_coding	-1.00399	0.000494571	0.00263466
ENSG00000113361	CDH6	protein_coding	-1.02897	0.00100774	0.00465619
ENSG00000172123	SLFN12	protein_coding	-1.01239	0.00132323	0.00580611
ENSG00000102287	GABRE	protein_coding	-1.1644	0.00962498	0.0277122
ENSG00000205670	SMIM11	protein_coding	-1.14391	0.0194052	0.0482073
ENSG00000239521	CASTOR3	transcribed_unprocessed_pseudogene	-1.06611	1.13139e-05	0.000140067
ENSG00000243970	PPIEL	transcribed_unprocessed_pseudogene	-1.07366	9.12039e-05	0.000710409
ENSG00000242294	STAG3L5P	transcribed_unprocessed_pseudogene	-1.25333	0.000135645	0.000962105
