# Supplementary material for: Competing endogenous RNAs in human astrocytes: crosstalk and interacting networks in response to lipotoxicity
Source: Front Neurosci. 2023 Nov 13;17:1195840. doi: 10.3389/fnins.2023.1195840 (PMC10679742; doi:10.3389/fnins.2023.1195840)
Supplement: Supplementary file 3 [file Table_3.XLSX]

## Sheet: MIR22HG (ENST00000334146)
Term	Homo sapiens - REFLIST (20589)	Client Text Box Input (19)	Client Text Box Input (expected)	Client Text Box Input (over/under)	Client Text Box Input (fold Enrichment)	Client Text Box Input (raw P-value)	Client Text Box Input (FDR)	Porc_Genes	Ontology_Source
TGF-beta signaling pathway (P00052)	102	11	0.09	+	>100	5.96E-21	9.53E-19	10.7843	Pathways
Gonadotropin-releasing hormone receptor pathway (P06664)	237	8	0.22	+	36.58	2.40E-11	1.92E-09	3.37553	Pathways
Unclassified (UNCLASSIFIED)	17971	4	16.58	-	0.24	8.90E-11	4.74E-09	0.0222581	Pathways
Wnt signaling pathway (P00057)	314	5	0.29	+	17.26	8.38E-06	3.35E-04	1.59236	Pathways
Ras Pathway (P04393)	76	3	0.07	+	42.77	5.03E-05	1.61E-03	3.94737	Pathways
FGF signaling pathway (P00021)	127	3	0.12	+	25.60	2.21E-04	5.89E-03	2.3622	Pathways
EGF receptor signaling pathway (P00018)	142	3	0.13	+	22.89	3.04E-04	6.96E-03	2.11268	Pathways
Angiogenesis (P00005)	181	3	0.17	+	17.96	6.11E-04	1.09E-02	1.65746	Pathways
Angiotensin II-stimulated signaling through G proteins and beta-arrestin (P05911)	37	2	0.03	+	58.57	5.85E-04	1.17E-02	5.40541	Pathways
Integrin signalling pathway (P00034)	200	3	0.18	+	16.25	8.12E-04	1.30E-02	1.5	Pathways
p53 pathway feedback loops 2 (P04398)	51	2	0.05	+	42.50	1.08E-03	1.57E-02	3.92157	Pathways
VEGF signaling pathway (P00056)	68	2	0.06	+	31.87	1.87E-03	2.31E-02	2.94118	Pathways
Inflammation mediated by chemokine and cytokine signaling pathway (P00031)	261	3	0.24	+	12.46	1.73E-03	2.31E-02	1.14943	Pathways
B cell activation (P00010)	71	2	0.07	+	30.52	2.04E-03	2.33E-02	2.8169	Pathways
Interleukin signaling pathway (P00036)	89	2	0.08	+	24.35	3.14E-03	3.14E-02	2.24719	Pathways
T cell activation (P00053)	92	2	0.08	+	23.56	3.35E-03	3.15E-02	2.17391	Pathways
p53 pathway (P00059)	89	2	0.08	+	24.35	3.14E-03	3.35E-02	2.24719	Pathways
Parkinson disease (P00049)	101	2	0.09	+	21.46	4.00E-03	3.56E-02	1.9802	Pathways
D5 dopamine receptor binding (GO:0031752)	2	2	0.00	+	100	4.83E-06	3.00E-03	100	MF
I-SMAD binding (GO:0070411)	14	4	0.01	+	100	1.57E-09	3.90E-06	28.5714	MF
activin receptor activity (GO:0017002)	10	2	0.01	+	100	5.29E-05	1.88E-02	20	MF
type I transforming growth factor beta receptor binding (GO:0034713)	11	2	0.01	+	100	6.24E-05	1.94E-02	18.1818	MF
co-SMAD binding (GO:0070410)	11	2	0.01	+	100	6.24E-05	1.83E-02	18.1818	MF
transmembrane receptor protein serine/threonine kinase activity (GO:0004675)	19	3	0.02	+	100	1.01E-06	1.26E-03	15.7895	MF
transforming growth factor beta receptor activity (GO:0005024)	13	2	0.01	+	100	8.40E-05	2.09E-02	15.3846	MF
R-SMAD binding (GO:0070412)	24	3	0.02	+	100	1.92E-06	1.59E-03	12.5	MF
dopamine receptor binding (GO:0050780)	16	2	0.01	+	100	1.22E-04	2.64E-02	12.5	MF
transforming growth factor beta receptor binding (GO:0005160)	24	3	0.02	+	100	1.92E-06	1.36E-03	12.5	MF
tau protein binding (GO:0048156)	43	4	0.04	+	100	8.97E-08	1.49E-04	9.30233	MF
G-protein beta/gamma-subunit complex binding (GO:0031683)	22	2	0.02	+	98.51	2.20E-04	3.41E-02	9.09091	MF
phosphatase activator activity (GO:0019211)	24	2	0.02	+	90.30	2.58E-04	3.78E-02	8.33333	MF
SMAD binding (GO:0046332)	78	6	.07	+	83.36	9.95E-11	4.95E-07	7.69231	MF
transmembrane receptor protein serine/threonine kinase binding (GO:0070696)	26	2	.02	+	83.36	3.00E-04	4.27E-02	7.69231	MF
transmembrane receptor protein kinase activity (GO:0019199)	81	3	.07	+	40.13	6.04E-05	2.00E-02	3.7037	MF
phosphatase regulator activity (GO:0019208)	118	3	.11	+	27.55	1.79E-04	2.96E-02	2.54237	MF
ubiquitin protein ligase binding (GO:0031625)	301	5	.28	+	18.00	6.85E-06	3.41E-03	1.66113	MF
ubiquitin-like protein ligase binding (GO:0044389)	320	5	.30	+	16.93	9.17E-06	4.15E-03	1.5625	MF
GTPase activity (GO:0003924)	333	4	.31	+	13.02	2.24E-04	3.38E-02	1.2012	MF
protein serine/threonine kinase activity (GO:0004674)	433	5	.40	+	12.51	3.85E-05	1.47E-02	1.15473	MF
GTP binding (GO:0005525)	382	4	.35	+	11.35	3.76E-04	5.05E-02	1.04712	MF
protein kinase activity (GO:0004672)	583	5	.54	+	9.29	1.55E-04	3.09E-02	0.857633	MF
phosphotransferase activity, alcohol group as acceptor (GO:0016773)	692	5	.64	+	7.83	3.42E-04	4.72E-02	0.722543	MF
cytoskeletal protein binding (GO:0008092)	1006	6	.93	+	6.46	2.16E-04	3.46E-02	0.596421	MF
enzyme binding (GO:0019899)	2103	10	1.94	+	5.15	4.86E-06	2.69E-03	0.475511	MF
signaling receptor binding (GO:0005102)	1602	7	1.48	+	4.73	3.80E-04	4.98E-02	0.436954	MF
purine ribonucleoside triphosphate binding (GO:0035639)	1839	8	1.70	+	4.71	1.26E-04	2.60E-02	0.435019	MF
purine ribonucleotide binding (GO:0032555)	1909	8	1.76	+	4.54	1.63E-04	3.13E-02	0.419068	MF
purine nucleotide binding (GO:0017076)	1923	8	1.77	+	4.51	1.72E-04	3.17E-02	0.416017	MF
ribonucleotide binding (GO:0032553)	1926	8	1.78	+	4.50	1.74E-04	3.09E-02	0.415369	MF
anion binding (GO:0043168)	2416	10	2.23	+	4.49	1.69E-05	7.01E-03	0.413907	MF
nucleotide binding (GO:0000166)	2170	8	2.00	+	3.99	3.97E-04	5.07E-02	0.368664	MF
nucleoside phosphate binding (GO:1901265)	2171	8	2.00	+	3.99	3.99E-04	4.96E-02	0.368494	MF
small molecule binding (GO:0036094)	2515	9	2.32	+	3.88	1.78E-04	3.05E-02	0.357853	MF
metal ion binding (GO:0046872)	4292	12	3.96	+	3.03	7.74E-05	2.03E-02	0.27959	MF
cation binding (GO:0043169)	4383	12	4.04	+	2.97	9.61E-05	2.17E-02	0.273785	MF
ion binding (GO:0043167)	6088	16	5.62	+	2.85	1.26E-06	1.26E-03	0.262812	MF
heterocyclic compound binding (GO:1901363)	5983	14	5.52	+	2.54	7.44E-05	2.06E-02	0.233996	MF
organic cyclic compound binding (GO:0097159)	6054	14	5.59	+	2.51	8.58E-05	2.03E-02	0.231252	MF
activin responsive factor complex (GO:0032444)	3	2	.00	+	100	8.04E-06	5.48E-03	66.6667	CC
heteromeric SMAD protein complex (GO:0071144)	8	4	.01	+	100	2.54E-10	5.19E-07	50	CC
SMAD protein complex (GO:0071141)	9	4	.01	+	100	3.67E-10	3.75E-07	44.4444	CC
extrinsic component of cytoplasmic side of plasma membrane (GO:0031234)	100	3	.09	+	32.51	1.11E-04	3.77E-02	3	CC
RNA polymerase II transcription regulator complex (GO:0090575)	251	4	.23	+	17.27	7.67E-05	3.92E-02	1.59363	CC
transcription regulator complex (GO:0005667)	512	5	.47	+	10.58	8.47E-05	3.46E-02	0.976562	CC
cytosol (GO:0005829)	5458	13	5.04	+	2.58	1.62E-04	4.72E-02	0.238182	CC
cellular response to transforming growth factor beta stimulus (GO:0071560)	31	5	.03	+	100	1.39E-10	4.41E-08	16.129	BP
response to transforming growth factor beta (GO:0071559)	31	5	.03	+	100	1.39E-10	3.86E-08	16.129	BP
transforming growth factor beta receptor signaling pathway (GO:0007179)	31	5	.03	+	100	1.39E-10	3.43E-08	16.129	BP
BMP signaling pathway (GO:0030509)	63	6	.06	+	100	2.96E-11	1.64E-08	9.52381	BP
cellular response to BMP stimulus (GO:0071773)	64	6	.06	+	100	3.23E-11	1.44E-08	9.375	BP
response to BMP (GO:0071772)	64	6	.06	+	100	3.23E-11	1.20E-08	9.375	BP
transmembrane receptor protein serine/threonine kinase signaling pathway (GO:0007178)	95	8	.09	+	91.25	2.13E-14	4.73E-11	8.42105	BP
Rho protein signal transduction (GO:0007266)	48	3	.04	+	67.73	1.35E-05	1.11E-03	6.25	BP
response to growth factor (GO:0070848)	139	8	.13	+	62.37	3.91E-13	4.34E-10	5.7554	BP
cellular response to growth factor stimulus (GO:0071363)	139	8	.13	+	62.37	3.91E-13	2.89E-10	5.7554	BP
actomyosin structure organization (GO:0031032)	42	2	.04	+	51.60	7.44E-04	4.24E-02	4.7619	BP
Ras protein signal transduction (GO:0007265)	110	4	.10	+	39.40	3.23E-06	3.12E-04	3.63636	BP
small GTPase mediated signal transduction (GO:0007264)	124	4	.11	+	34.96	5.12E-06	4.74E-04	3.22581	BP
cellular response to endogenous stimulus (GO:0071495)	235	7	.22	+	32.28	1.26E-09	2.55E-07	2.97872	BP
response to endogenous stimulus (GO:0009719)	250	7	.23	+	30.34	1.92E-09	3.55E-07	2.8	BP
enzyme linked receptor protein signaling pathway (GO:0007167)	303	8	.28	+	28.61	1.61E-10	3.57E-08	2.64026	BP
cellular response to organic substance (GO:0071310)	473	8	.44	+	18.33	5.01E-09	7.95E-07	1.69133	BP
response to organic substance (GO:0010033)	573	8	.53	+	15.13	2.19E-08	2.85E-06	1.39616	BP
cellular response to chemical stimulus (GO:0070887)	581	8	.54	+	14.92	2.43E-08	3.00E-06	1.37694	BP
anatomical structure morphogenesis (GO:0009653)	485	5	.45	+	11.17	6.57E-05	5.03E-03	1.03093	BP
response to chemical (GO:0042221)	818	8	.75	+	10.60	3.28E-07	3.47E-05	0.977995	BP
protein phosphorylation (GO:0006468)	423	4	.39	+	10.25	5.50E-04	3.39E-02	0.945626	BP
cell surface receptor signaling pathway (GO:0007166)	999	8	.92	+	8.68	1.48E-06	1.49E-04	0.800801	BP
intracellular signal transduction (GO:0035556)	820	5	.76	+	6.61	7.39E-04	4.32E-02	0.609756	BP
signal transduction (GO:0007165)	2150	13	1.98	+	6.55	2.68E-09	4.57E-07	0.604651	BP
cellular protein modification process (GO:0006464)	1220	7	1.13	+	6.22	6.97E-05	5.16E-03	0.57377	BP
protein modification process (GO:0036211)	1220	7	1.13	+	6.22	6.97E-05	4.99E-03	0.57377	BP
signaling (GO:0023052)	2321	13	2.14	+	6.07	6.85E-09	1.01E-06	0.560103	BP
cell communication (GO:0007154)	2328	13	2.15	+	6.05	7.11E-09	9.86E-07	0.558419	BP
macromolecule modification (GO:0043412)	1331	7	1.23	+	5.70	1.21E-04	8.36E-03	0.52592	BP
anatomical structure development (GO:0048856)	1187	6	1.10	+	5.48	5.25E-04	3.33E-02	0.505476	BP
cellular response to stimulus (GO:0051716)	2589	13	2.39	+	5.44	2.60E-08	3.04E-06	0.502124	BP
response to stimulus (GO:0050896)	3119	13	2.88	+	4.52	2.47E-07	2.75E-05	0.4168	BP
cellular protein metabolic process (GO:0044267)	1765	7	1.63	+	4.30	6.85E-04	4.11E-02	0.396601	BP
cellular macromolecule metabolic process (GO:0044260)	3864	11	3.57	+	3.08	1.73E-04	1.16E-02	0.284679	BP
regulation of cellular process (GO:0050794)	4940	14	4.56	+	3.07	6.98E-06	6.19E-04	0.283401	BP
regulation of biological process (GO:0050789)	5162	14	4.76	+	2.94	1.21E-05	1.03E-03	0.271213	BP
biological regulation (GO:0065007)	5616	14	5.18	+	2.70	3.43E-05	2.72E-03	0.249288	BP
cellular process (GO:0009987)	10019	17	9.25	+	1.84	3.01E-04	1.97E-02	0.169678	BP

## Sheet: SDCBP2-AS1 (ENST00000446423)
Term	Homo sapiens - REFLIST (20589)	Client Text Box Input (55)	Client Text Box Input (fold Enrichment)	Client Text Box Input (raw P-value)	Client Text Box Input (FDR)	Ontology_Source
Ras Pathway (P04393)	76	5	24.63	2.45e-06	0.000196	Pathways
PI3 kinase pathway (P00048)	57	3	19.7	0.00055	0.00978	Pathways
Interleukin signaling pathway (P00036)	89	4	16.82	0.00011	0.00353	Pathways
Angiogenesis (P00005)	181	7	14.48	6.52e-07	0.000104	Pathways
CCKR signaling map (P06959)	173	6	12.98	7.96e-06	0.000425	Pathways
PDGF signaling pathway (P00047)	145	5	12.91	4.92e-05	0.00197	Pathways
p53 pathway (P00059)	89	3	12.62	0.0019	0.0276	Pathways
Apoptosis signaling pathway (P00006)	125	4	11.98	0.000388	0.0103	Pathways
FGF signaling pathway (P00021)	127	4	11.79	0.000411	0.0094	Pathways
EGF receptor signaling pathway (P00018)	142	4	10.54	0.000619	0.0099	Pathways
Gonadotropin-releasing hormone receptor pathway (P06664)	237	5	7.9	0.000458	0.00917	Pathways
Integrin signalling pathway (P00034)	200	4	7.49	0.00213	0.0284	Pathways
enzyme binding (GO:0019899)	2103	18	3.2	5.23e-06	0.00867	MF
heterocyclic compound binding (GO:1901363)	5983	33	2.06	1.99e-06	0.0099	MF
organic cyclic compound binding (GO:0097159)	6054	33	2.04	3.72e-06	0.00926	MF
cytoplasmic stress granule (GO:0010494)	87	5	21.51	4.6e-06	0.00469	CC
catalytic complex (GO:1902494)	1686	14	3.11	0.000108	0.0443	CC
cytosol (GO:0005829)	5458	31	2.13	3.73e-06	0.00761	CC
protein-containing complex (GO:0032991)	5771	30	1.95	5.64e-05	0.0384	CC
cytoplasm (GO:0005737)	12097	46	1.42	9.81e-05	0.0501	CC
negative regulation of thrombin-activated receptor signaling pathway (GO:0070495)	3	2	100	6.93e-05	0.0259	BP
regulation of thrombin-activated receptor signaling pathway (GO:0070494)	3	2	100	6.93e-05	0.0253	BP
negative regulation of guanyl-nucleotide exchange factor activity (GO:1905098)	6	3	100	1.49e-06	0.00333	BP
regulation of guanyl-nucleotide exchange factor activity (GO:1905097)	10	3	100	5.02e-06	0.00787	BP
regulation of GTP binding (GO:1904424)	16	3	70.19	1.68e-05	0.0139	BP
regulation of cellular response to heat (GO:1900034)	17	3	66.06	1.98e-05	0.0129	BP
stress granule assembly (GO:0034063)	25	4	59.9	1.02e-06	0.00399	BP
positive regulation of mitochondrial membrane permeability (GO:0035794)	32	3	35.09	0.00011	0.0288	BP
ER-nucleus signaling pathway (GO:0006984)	33	3	34.03	0.00012	0.0309	BP
positive regulation of membrane permeability (GO:1905710)	36	3	31.2	0.000153	0.0347	BP
positive regulation of dendritic spine development (GO:0060999)	37	3	30.35	0.000165	0.0364	BP
peptidyl-threonine phosphorylation (GO:0018107)	70	4	21.39	4.52e-05	0.0197	BP
positive regulation of neuron death (GO:1901216)	93	5	20.13	6.27e-06	0.00894	BP
peptidyl-threonine modification (GO:0018210)	79	4	18.95	7.09e-05	0.0247	BP
cellular response to unfolded protein (GO:0034620)	80	4	18.72	7.43e-05	0.0233	BP
cellular response to topologically incorrect protein (GO:0035967)	100	4	14.97	0.00017	0.0365	BP
extrinsic apoptotic signaling pathway (GO:0097191)	110	4	13.61	0.000242	0.0452	BP
limbic system development (GO:0021761)	113	4	13.25	0.000267	0.0488	BP
positive regulation of binding (GO:0051099)	181	6	12.41	1.02e-05	0.0114	BP
regulation of microtubule cytoskeleton organization (GO:0070507)	157	5	11.92	7.09e-05	0.0242	BP
male sex differentiation (GO:0046661)	167	5	11.21	9.41e-05	0.0268	BP
response to endoplasmic reticulum stress (GO:0034976)	222	6	10.12	3.13e-05	0.0154	BP
peptidyl-serine phosphorylation (GO:0018105)	186	5	10.06	0.000154	0.0345	BP
protein autophosphorylation (GO:0046777)	189	5	9.9	0.000165	0.036	BP
positive regulation of protein-containing complex assembly (GO:0031334)	194	5	9.65	0.000186	0.0389	BP
regulation of protein polymerization (GO:0032271)	201	5	9.31	0.000219	0.0418	BP
peptidyl-serine modification (GO:0018209)	206	5	9.09	0.000244	0.0451	BP
regulation of microtubule-based process (GO:0032886)	260	6	8.64	7.39e-05	0.0236	BP
positive regulation of DNA metabolic process (GO:0051054)	305	7	8.59	1.84e-05	0.0144	BP
regulation of protein-containing complex assembly (GO:0043254)	412	9	8.18	1.55e-06	0.00304	BP
apoptotic signaling pathway (GO:0097190)	316	6	7.11	0.000209	0.0411	BP
regulation of binding (GO:0051098)	374	7	7.01	6.53e-05	0.025	BP
regulation of GTPase activity (GO:0043087)	378	7	6.93	6.98e-05	0.0249	BP
regulation of cellular response to stress (GO:0080135)	709	13	6.86	3.93e-08	0.000617	BP
regulation of DNA metabolic process (GO:0051052)	541	9	6.23	1.35e-05	0.0125	BP
transmembrane receptor protein tyrosine kinase signaling pathway (GO:0007169)	424	7	6.18	0.000141	0.0334	BP
positive regulation of organelle organization (GO:0010638)	508	8	5.9	6.26e-05	0.0245	BP
regulation of cytoskeleton organization (GO:0051493)	540	8	5.55	9.51e-05	0.0266	BP
protein phosphorylation (GO:0006468)	719	10	5.21	1.97e-05	0.0134	BP
peptidyl-amino acid modification (GO:0018193)	882	11	4.67	1.95e-05	0.0139	BP
negative regulation of programmed cell death (GO:0043069)	918	11	4.49	2.8e-05	0.0147	BP
regulation of organelle organization (GO:0033043)	1189	14	4.41	2.21e-06	0.00385	BP
positive regulation of cellular component organization (GO:0051130)	1054	12	4.26	1.89e-05	0.0141	BP
negative regulation of apoptotic process (GO:0043066)	898	10	4.17	0.000125	0.0305	BP
phosphorylation (GO:0016310)	918	10	4.08	0.000149	0.0348	BP
regulation of hydrolase activity (GO:0051336)	1020	11	4.04	7.23e-05	0.0241	BP
negative regulation of cell death (GO:0060548)	1022	11	4.03	7.35e-05	0.024	BP
intracellular signal transduction (GO:0035556)	1511	16	3.96	1.39e-06	0.00363	BP
regulation of cellular component biogenesis (GO:0044087)	951	10	3.94	0.000198	0.0403	BP
regulation of response to stress (GO:0080134)	1373	14	3.82	1.15e-05	0.0112	BP
cell death (GO:0008219)	1108	11	3.72	0.00015	0.0345	BP
regulation of intracellular signal transduction (GO:1902531)	1721	15	3.26	3.29e-05	0.0152	BP
cell development (GO:0048468)	1725	15	3.26	3.38e-05	0.0152	BP
regulation of programmed cell death (GO:0043067)	1498	13	3.25	0.000131	0.0315	BP
phosphate-containing compound metabolic process (GO:0006796)	1855	15	3.03	7.77e-05	0.0234	BP
phosphorus metabolic process (GO:0006793)	1881	15	2.99	9.09e-05	0.0264	BP
regulation of cellular component organization (GO:0051128)	2364	18	2.85	2.62e-05	0.0147	BP
protein modification process (GO:0036211)	2658	20	2.82	9.07e-06	0.0109	BP
negative regulation of cellular metabolic process (GO:0031324)	2264	17	2.81	5.68e-05	0.0228	BP
regulation of protein metabolic process (GO:0051246)	2587	19	2.75	2.37e-05	0.0138	BP
macromolecule modification (GO:0043412)	2883	21	2.73	8.08e-06	0.0106	BP
regulation of catalytic activity (GO:0050790)	2373	17	2.68	0.000102	0.0277	BP
negative regulation of nitrogen compound metabolic process (GO:0051172)	2409	17	2.64	0.000123	0.0307	BP
regulation of signal transduction (GO:0009966)	2989	20	2.5	5.13e-05	0.0212	BP
negative regulation of macromolecule metabolic process (GO:0010605)	2764	18	2.44	0.000203	0.0407	BP
regulation of molecular function (GO:0065009)	3094	20	2.42	8.41e-05	0.0249	BP
positive regulation of cellular metabolic process (GO:0031325)	3122	20	2.4	9.56e-05	0.0263	BP
negative regulation of metabolic process (GO:0009892)	2988	19	2.38	0.000171	0.0363	BP
positive regulation of nitrogen compound metabolic process (GO:0051173)	3174	20	2.36	0.000121	0.0305	BP
organelle organization (GO:0006996)	3026	19	2.35	0.000203	0.0402	BP
cell differentiation (GO:0030154)	3519	21	2.23	0.000197	0.0406	BP
regulation of response to stimulus (GO:0048583)	4034	24	2.23	4.89e-05	0.0207	BP
cellular developmental process (GO:0048869)	3542	21	2.22	0.000211	0.0408	BP
regulation of cellular metabolic process (GO:0031323)	5647	33	2.19	4.65e-07	0.00364	BP
regulation of nitrogen compound metabolic process (GO:0051171)	5709	33	2.16	9.39e-07	0.00491	BP
negative regulation of cellular process (GO:0048523)	4732	27	2.14	3.07e-05	0.0155	BP
regulation of nucleobase-containing compound metabolic process (GO:0019219)	4067	23	2.12	0.000231	0.0437	BP
regulation of primary metabolic process (GO:0080090)	5872	33	2.1	1.37e-06	0.00431	BP
positive regulation of cellular process (GO:0048522)	5670	31	2.05	1.12e-05	0.0118	BP
cellular component organization (GO:0016043)	5523	30	2.03	2.02e-05	0.0127	BP
negative regulation of biological process (GO:0048519)	5314	28	1.97	7.52e-05	0.0231	BP
cellular component organization or biogenesis (GO:0071840)	5727	30	1.96	3.17e-05	0.0151	BP
regulation of macromolecule metabolic process (GO:0060255)	6214	32	1.93	2.17e-05	0.0131	BP
positive regulation of biological process (GO:0048518)	6304	32	1.9	2.62e-05	0.0142	BP
regulation of metabolic process (GO:0019222)	6754	34	1.88	1.68e-05	0.0146	BP
regulation of cellular process (GO:0050794)	11187	44	1.47	0.000108	0.0287	BP

## Sheet: MEG3 (ENST00000398461)
Term	Homo sapiens - REFLIST (20589)	Client Text Box Input (55)	Client Text Box Input (fold Enrichment)	Client Text Box Input (raw P-value)	Client Text Box Input (FDR)	Ontology_Source
p53 pathway by glucose deprivation	23	3	28.27	2.26E-04	1.64E-03	Pathways
p53 pathway feedback loops 2	51	6	25.50	2.40E-07	3.85E-06	Pathways
Ras Pathway	76	8	22.81	4.80E-09	1.54E-07	Pathways
PI3 kinase pathway	57	6	22.81	4.40E-07	5.42E-06	Pathways
T cell activation	92	8	18.85	1.93E-08	3.43E-07	Pathways
FGF signaling pathway	127	11	18.77	3.77E-11	3.02E-09	Pathways
B cell activation	71	6	18.31	1.46E-06	1.56E-05	Pathways
Heterotrimeric G-protein signaling pathway-rod outer segment phototransduction	37	3	17.57	8.20E-04	5.70E-03	Pathways
Enkephalin release	38	3	17.11	8.82E-04	5.88E-03	Pathways
p53 pathway	89	7	17.05	2.94E-07	4.28E-06	Pathways
Interleukin signaling pathway	89	7	17.05	2.94E-07	3.93E-06	Pathways
Histamine H2 receptor mediated signaling pathway	27	2	16.05	7.82E-03	4.31E-02	Pathways
Apoptosis signaling pathway	125	9	15.60	1.12E-08	3.00E-07	Pathways
EGF receptor signaling pathway	142	10	15.26	2.02E-09	8.08E-08	Pathways
Beta3 adrenergic receptor signaling pathway	29	2	14.95	8.90E-03	4.75E-02	Pathways
CCKR signaling map	173	10	12.53	1.21E-08	2.77E-07	Pathways
Angiogenesis	181	10	11.97	1.82E-08	3.65E-07	Pathways
Oxidative stress response	56	3	11.61	2.53E-03	1.62E-02	Pathways
Huntington disease	152	8	11.41	7.39E-07	8.45E-06	Pathways
Dopamine receptor mediated signaling pathway	58	3	11.21	2.79E-03	1.71E-02	Pathways
Gonadotropin-releasing hormone receptor pathway	237	12	10.97	1.61E-09	8.56E-08	Pathways
Parkinson disease	101	5	10.73	1.29E-04	9.84E-04	Pathways
Toll receptor signaling pathway	61	3	10.66	3.19E-03	1.89E-02	Pathways
PDGF signaling pathway	145	7	10.46	6.48E-06	6.10E-05	Pathways
Heterotrimeric G-protein signaling pathway-Gi alpha and Gs alpha mediated pathway	163	7	9.31	1.35E-05	1.20E-04	Pathways
Integrin signalling pathway	200	8	8.67	5.25E-06	5.25E-05	Pathways
Inflammation mediated by chemokine and cytokine signaling pathway	261	8	6.64	3.37E-05	2.84E-04	Pathways
Alzheimer disease-presenilin pathway	131	4	6.62	3.49E-03	2.00E-02	Pathways
Wnt signaling pathway	314	8	5.52	1.19E-04	9.50E-04	Pathways
dopamine receptor binding	4	2	> 100	3.09E-04	1.21E-02	MF
protein binding	2812	27	2.08	1.46E-04	6.63E-03	MF
binding	5893	49	1.80	3.35E-06	3.66E-04	MF
phosphoprotein phosphatase activity	114	5	9.51	2.22E-04	9.33E-03	MF
catalytic activity	3916	37	2.05	9.02E-06	7.04E-04	MF
catalytic activity, acting on a protein	1473	21	3.09	3.23E-06	4.40E-04	MF
chromatin binding	169	5	6.41	1.25E-03	4.56E-02	MF
protein serine/threonine kinase activity	316	9	6.17	1.88E-05	1.14E-03	MF
extrinsic component of plasma membrane	81	4	10.70	6.36E-04	3.61E-02	CC
membrane	7917	54	1.48	3.03E-04	1.94E-02	CC
cellular anatomical entity	10794	74	1.49	4.46E-07	1.14E-04	CC
cytoplasm	4841	44	1.97	1.27E-06	1.30E-04	CC
intracellular anatomical structure	7551	61	1.75	8.02E-08	4.10E-05	CC
intracellular organelle	5959	45	1.64	1.57E-04	1.34E-02	CC
organelle	6143	46	1.62	1.73E-04	1.26E-02	CC
extrinsic apoptotic signaling pathway in absence of ligand	17	3	38.25	1.01E-04	1.50E-02	BP
signal transduction	2150	29	2.92	7.68E-08	3.41E-05	BP
cellular process	10019	76	1.64	6.58E-10	4.87E-07	BP
cellular response to stimulus	2589	32	2.68	9.58E-08	3.54E-05	BP
response to stimulus	3119	34	2.36	7.92E-07	1.60E-04	BP
regulation of cellular process	4940	51	2.24	6.45E-10	7.16E-07	BP
regulation of biological process	5162	53	2.23	2.34E-10	5.19E-07	BP
biological regulation	5616	53	2.05	5.59E-09	3.10E-06	BP
cell communication	2328	29	2.70	4.14E-07	9.19E-05	BP
signaling	2321	29	2.71	3.89E-07	9.59E-05	BP
positive regulation of transcription by RNA polymerase II	181	6	7.18	2.25E-04	3.12E-02	BP
intracellular signal transduction	820	15	3.96	5.90E-06	1.09E-03	BP
negative regulation of cellular process	1005	16	3.45	1.55E-05	2.45E-03	BP
negative regulation of biological process	1122	17	3.28	1.52E-05	2.60E-03	BP
cellular macromolecule metabolic process	3864	33	1.85	2.97E-04	3.88E-02	BP

## Sheet: lncRNAs_up
Term	Homo.sapiens...REFLIST..20589.	Client.Text.Box.Input..95.	Client.Text.Box.Input..expected.	Client.Text.Box.Input..fold.Enrichment.	Client.Text.Box.Input..raw.P.value.	Client.Text.Box.Input..FDR.	Porc_Genes	Ontology_Source
Ras Pathway	76	9	0.48	18.9	2.93e-09	1.17e-07	11.8421	Pathways
TGF-beta signaling pathway	102	11	0.64	17.21	1.2e-10	6.41e-09	10.7843	Pathways
Interleukin signaling pathway	89	7	0.56	12.55	2.32e-06	3.71e-05	7.86517	Pathways
FGF signaling pathway	127	9	0.8	11.31	1.83e-07	4.87e-06	7.08661	Pathways
PI3 kinase pathway	57	4	0.36	11.2	0.000569	0.00535	7.01754	Pathways
Gonadotropin-releasing hormone receptor pathway	237	16	1.48	10.77	4.75e-12	7.59e-10	6.75105	Pathways
EGF receptor signaling pathway	142	9	0.89	10.12	4.45e-07	8.9e-06	6.33803	Pathways
Angiogenesis	181	11	1.13	9.7	3.34e-08	1.07e-06	6.07735	Pathways
CCKR signaling map	173	10	1.08	9.23	2.24e-07	5.12e-06	5.78035	Pathways
p53 pathway	89	5	0.56	8.97	0.000305	0.00349	5.61798	Pathways
Apoptosis signaling pathway	125	7	0.78	8.94	1.9e-05	0.000234	5.6	Pathways
PDGF signaling pathway	145	8	0.91	8.81	5.28e-06	7.67e-05	5.51724	Pathways
T cell activation	92	5	0.58	8.67	0.000353	0.00376	5.43478	Pathways
Integrin signalling pathway	200	10	1.25	7.98	7.96e-07	1.42e-05	5	Pathways
Wnt signaling pathway	314	11	1.97	5.59	6.14e-06	8.18e-05	3.50318	Pathways
Transforming growth factor beta receptor signaling pathway	31	5	0.19	25.74	2.8e-06	0.000207	16.129	BP
BMP signaling pathway	63	6	0.39	15.2	4.51e-06	0.000286	9.52381	BP
SMAD binding	23	4	0.14	27.76	2.25e-05	0.000879	17.3913	MF
Protein kinase activity	475	15	2.98	5.04	4.14e-07	3.23e-05	3.15789	MF
Heteromeric SMAD protein complex	8	4	0.05	79.8	6.83e-07	0.000107	50	CC
Cytoplasmic stress granule	87	6	0.55	11.01	2.54e-05	0.00216	6.89655	CC
Focal adhesion	423	13	2.65	4.91	3.42e-06	0.000412	3.07329	CC

## Sheet: lncRNAs_down
Term	Homo.sapiens...REFLIST..20589.	Client.Text.Box.Input..95.	Client.Text.Box.Input..expected.	Client.Text.Box.Input..fold.Enrichment.	Client.Text.Box.Input..raw.P.value.	Client.Text.Box.Input..FDR.	Porc_Genes	Ontology_Source
Ras Pathway	76	10	0.54	18.43	5.26e-10	2.81e-08	13.1579	Pathways
p53 pathway by glucose deprivation	23	3	0.16	18.27	0.000805	0.00613	13.0435	Pathways
PI3 kinase pathway	57	7	0.41	17.2	3.45e-07	5.53e-06	12.2807	Pathways
FGF signaling pathway	127	12	0.91	13.23	3.16e-10	2.52e-08	9.44882	Pathways
T cell activation	92	8	0.66	12.18	5.65e-07	8.22e-06	8.69565	Pathways
B cell activation	71	6	0.51	11.84	1.8e-05	0.000169	8.4507	Pathways
Apoptosis signaling pathway	125	10	0.89	11.2	4.36e-08	1.16e-06	8	Pathways
p53 pathway	89	7	0.64	11.02	5.49e-06	6.75e-05	7.86517	Pathways
Interleukin signaling pathway	89	7	0.64	11.02	5.49e-06	6.27e-05	7.86517	Pathways
EGF receptor signaling pathway	142	11	1.01	10.85	1.23e-08	4.92e-07	7.74648	Pathways
Oxidative stress response	56	4	0.4	10	0.000869	0.00632	7.14286	Pathways
Parkinson disease	101	7	0.72	9.71	1.2e-05	0.000128	6.93069	Pathways
Huntington disease	152	10	1.09	9.21	2.43e-07	4.32e-06	6.57895	Pathways
CCKR signaling map	173	11	1.24	8.91	8.27e-08	1.89e-06	6.35838	Pathways
Angiogenesis	181	11	1.29	8.51	1.27e-07	2.55e-06	6.07735	Pathways
PDGF signaling pathway	145	8	1.04	7.73	1.37e-05	0.000137	5.51724	Pathways
Gonadotropin-releasing hormone receptor pathway	237	13	1.69	7.68	2.77e-08	8.86e-07	5.48523	Pathways
Heterotrimeric G-protein signaling pathway-Gi alpha and Gs alpha mediated pathway	163	8	1.16	6.87	3.06e-05	0.000272	4.90798	Pathways
Integrin signalling pathway	200	8	1.43	5.6	0.000121	0.00102	4	Pathways
Extrinsic apoptotic signaling pathway in absence of ligand	17	4	0.12	32.96	1.32e-05	0.00293	23.5294	BP
Dopamine receptor binding	4	3	0.03	100	1.2e-05	0.00131	75	MF
Chromatin binding	169	7	1.21	5.8	0.000264	0.00849	4.14201	MF
Protein serine/threonine kinase activity	316	11	2.26	4.88	2.23e-05	0.00203	3.48101	MF
Bcl-2 family protein complex	9	3	0.06	46.69	7.33e-05	0.00405	33.3333	CC
Beta-catenin destruction complex	11	3	0.08	38.2	0.00012	0.00584	27.2727	CC
Heterotrimeric G-protein complex	34	4	0.24	16.48	0.000148	0.00689	11.7647	CC
Azurophil granule	154	7	1.1	6.37	0.000153	0.00695	4.54545	CC
Extracellular exosome	2100	38	14.99	2.53	6.6e-08	1.12e-05	1.80952	CC
