# Supplementary material for: Competing endogenous RNAs in human astrocytes: crosstalk and interacting networks in response to lipotoxicity
Source: Front Neurosci. 2023 Nov 13;17:1195840. doi: 10.3389/fnins.2023.1195840 (PMC10679742; doi:10.3389/fnins.2023.1195840)
Supplement: Supplementary file 4 [file Table_4.XLSX]

## Sheet: MEG3 (ENST00000396181)
KEGG pathway	p-value	#genes	#miRNAs
Proteoglycans in cancer	6.21615911436e-14	147	19
Cell cycle	3.66717576146e-11	98	19
Protein processing in endoplasmic reticulum	5.93796367003e-10	130	18
ECM-receptor interaction	1.6543822109e-09	51	19
Adherens junction	3.97125467999e-09	61	19
Viral carcinogenesis	3.97125467999e-09	143	19
Pathways in cancer	4.74839509541e-09	272	19
Renal cell carcinoma	7.30307978431e-09	56	19
Hippo signaling pathway	3.03682517031e-08	103	19
Ubiquitin mediated proteolysis	9.48400507487e-08	104	19
TGF-beta signaling pathway	3.63296441567e-07	60	19
Chronic myeloid leukemia	3.71971686885e-07	59	19
Glioma	5.62153987058e-07	50	19
Prostate cancer	6.22821007387e-07	71	19
Fatty acid metabolism	1.05579193573e-06	33	17
Fatty acid biosynthesis	2.73670643642e-06	8	16
Endocytosis	3.07677228231e-06	143	19
Hepatitis B	8.48410200645e-06	99	19
Colorectal cancer	8.48410200645e-06	49	19
FoxO signaling pathway	9.9863457692e-06	97	19
Acute myeloid leukemia	9.9863457692e-06	47	19
Small cell lung cancer	1.07787106033e-05	67	19
Estrogen signaling pathway	1.55802902994e-05	71	19
Shigellosis	2.25443442642e-05	50	19
Non-small cell lung cancer	2.25443442642e-05	45	19
Bacterial invasion of epithelial cells	3.47150228544e-05	56	19
Bladder cancer	3.47150228544e-05	33	19
Endometrial cancer	4.17671565025e-05	42	19
Prion diseases	6.52180652949e-05	20	18
ErbB signaling pathway	7.24157610385e-05	63	19
Neurotrophin signaling pathway	7.43007464026e-05	85	19
HIF-1 signaling pathway	9.40331385095e-05	77	19
Oocyte meiosis	0.000166314842417	77	19
Insulin signaling pathway	0.000166314842417	99	19
Glycosaminoglycan biosynthesis - chondroitin sulfate / dermatan sulfate	0.000193783799079	13	17
Signaling pathways regulating pluripotency of stem cells	0.000193783799079	95	19
Thyroid cancer	0.000224707504913	23	18
Pancreatic cancer	0.000247306588685	50	19
Lysine degradation	0.000283383586748	33	19
Sphingolipid signaling pathway	0.000470392086333	80	19
p53 signaling pathway	0.000787804527945	52	19
Focal adhesion	0.000914494238295	136	19
Epstein-Barr virus infection	0.000938022590476	133	19
mTOR signaling pathway	0.00101020120203	46	19
TNF signaling pathway	0.0010711375583	77	19
Gap junction	0.00113519479851	62	19
Other types of O-glycan biosynthesis	0.00126830050748	19	17
Pathogenic Escherichia coli infection	0.0015259361197	42	19
Central carbon metabolism in cancer	0.0015259361197	47	19
Glycosaminoglycan biosynthesis - keratan sulfate	0.00411089498205	12	17
Biotin metabolism	0.00482073444494	3	2
AMPK signaling pathway	0.00528178164447	85	19
Melanoma	0.00754724911412	48	19
Transcriptional misregulation in cancer	0.0088267580143	114	19
RNA transport	0.00882967611986	108	18
Thyroid hormone signaling pathway	0.00894529440798	81	19
Choline metabolism in cancer	0.00922823357091	69	19
mRNA surveillance pathway	0.0103080662621	64	18
Steroid biosynthesis	0.0115170168871	13	16
Progesterone-mediated oocyte maturation	0.0128285541327	60	19
Fc gamma R-mediated phagocytosis	0.0144382497306	61	19
RNA polymerase	0.0174952522674	24	17
Phosphatidylinositol signaling system	0.0176388162335	53	19
Fatty acid degradation	0.0196837527331	27	14
HTLV-I infection	0.0212241961889	161	19
Axon guidance	0.0230454097824	79	18
Inositol phosphate metabolism	0.0253572228184	39	18
Epithelial cell signaling in Helicobacter pylori infection	0.0284014896878	46	18
Citrate cycle (TCA cycle)	0.030782608952	21	17
GnRH signaling pathway	0.0337192866914	60	19
Wnt signaling pathway	0.0380705556838	85	19
Fatty acid elongation	0.0404011122176	14	17

## Sheet: MEG3 (ENST00000648820)
KEGG pathway	p-value	#genes	#miRNAs
Proteoglycans in cancer	4.66958336523e-07	27	1
Hippo signaling pathway	1.63766247002e-06	22	1
FoxO signaling pathway	4.02619805163e-05	27	1
TGF-beta signaling pathway	4.02619805163e-05	12	1
Focal adhesion	0.000389655043693	33	1
ECM-receptor interaction	0.000389655043693	8	1
Pathways in cancer	0.000389655043693	43	1
Renal cell carcinoma	0.000389655043693	14	1
Hepatitis C	0.00098247211228	24	1
Colorectal cancer	0.000992809561587	13	1
Endocytosis	0.00179832371309	30	1
Chronic myeloid leukemia	0.00307998087009	15	1
Lysine degradation	0.00318815171533	7	1
Steroid biosynthesis	0.00400026791753	3	1
Protein processing in endoplasmic reticulum	0.00400465697078	22	1
Glioma	0.00400465697078	11	1
Adherens junction	0.00633418469743	15	1
Pancreatic cancer	0.00874273466326	13	1
Prostate cancer	0.00874273466326	16	1
MAPK signaling pathway	0.0125976601818	31	1
Non-small cell lung cancer	0.0130497130856	10	1
Circadian rhythm	0.0138977555889	7	1
Thyroid cancer	0.0138977555889	7	1
Acute myeloid leukemia	0.0138977555889	10	1
Endometrial cancer	0.0160820596169	9	1
Wnt signaling pathway	0.0172676451321	21	1
Prolactin signaling pathway	0.0172676451321	12	1
Gap junction	0.0176963152561	9	1
Signaling pathways regulating pluripotency of stem cells	0.0176963152561	17	1
Hepatitis B	0.0192643668196	16	1
Axon guidance	0.0240556683297	15	1
Terpenoid backbone biosynthesis	0.0461833687139	5	1
RNA degradation	0.0461833687139	12	1
Ubiquitin mediated proteolysis	0.0461833687139	19	1
Bacterial invasion of epithelial cells	0.0461833687139	13	1
Bladder cancer	0.0461833687139	8	1
Transcriptional misregulation in cancer	0.0469766099281	21	1
Melanoma	0.0485966352447	10	1

## Sheet: LINC01503 (ENST00000444125)
GO Category	p-value	#genes	#miRNAs
organelle	1.54737e-27	206	1
gene expression	1.19652e-09	26	1
cytosol	1.50885e-09	74	1
cellular protein modification process	2.17573e-09	62	1
nucleoplasm	2.90281e-09	42	1
molecular_function	5.77291e-09	276	1
cellular nitrogen compound metabolic process	8.36299e-09	95	1
viral process	9.23866e-09	22	1
symbiosis	2.28388e-08	2283.88	23
biosynthetic process	1.90476e-07	83	1
membrane organization	3.99711e-07	24	1
protein complex	3.99711e-07	84	1
enzyme binding	4.64638e-07	39	1
mitotic cell cycle	6.12142e-07	18	1
cellular protein metabolic process	1.12939e-06	19	1
cell death	1.42811e-06	31	1
RNA binding	2.25661e-06	50	1
small molecule metabolic process	2.43205e-06	54	1
ion binding	2.55213e-06	107	1
biological_process	3.4148e-05	264	1
blood coagulation	4.50397e-05	17	1
mRNA metabolic process	8.4908e-05	11	1
platelet activation	0.000102426	11	1
intracellular transport of virus	0.000197534	4	1
post-translational protein modification	0.000272995	9	1
cellular_component	0.000285153	267	1
RNA metabolic process	0.000533568	11	1
poly(A) RNA binding	0.000591537	43	1
Fc-epsilon receptor signaling pathway	0.000644146	8	1
viral life cycle	0.00129509	7	1
immune system process	0.00140796	37	1
virion assembly	0.00209699	4	1
catabolic process	0.00229015	40	1
neurotrophin TRK receptor signaling pathway	0.00449127	9	1
mammary gland epithelial cell differentiation	0.00571408	4	1
protein N-linked glycosylation via asparagine	0.0084073	6	1
translation factor activity	0.00866376	7	1
platelet degranulation	0.00951085	5	1
vesicle-mediated transport	0.00951085	26	1
KEGG pathway	p-value	#genes	#miRNAs
Adherens junction(hsa04520)	0.00446848	5	1

## Sheet: AC092687.3 (ENST00000606907)
KEGG pathway	p-value	#genes	#miRNAs
Fatty acid biosynthesis	1.08e-14	1	1
Hippo signaling pathway	1.03e-06	33	2
ECM-receptor interaction	3.77e-06	14	2
Viral carcinogenesis	3.77e-06	40	2
Lysine degradation	5.98e-06	11	2
Cell cycle	1.77e-05	33	2
Thyroid hormone signaling pathway	1.84e-05	28	2
Glycosaminoglycan biosynthesis - keratan sulfate	0.00024	5	1
Hepatitis B	0.000343	34	2
Proteoglycans in cancer	0.000343	40	2
Sulfur relay system	0.000399	4	1
Adherens junction	0.000401	20	2
p53 signaling pathway	0.000537	21	2
Chronic myeloid leukemia	0.000744	18	2
Small cell lung cancer	0.00232	22	1
Pathways in cancer	0.00253	62	2
Glioma	0.00253	16	2
Oocyte meiosis	0.00594	25	2
Protein processing in endoplasmic reticulum	0.0082	34	2

## Sheet: SERTAD4-AS1 (ENST00000437764)
KEGG pathway	p-value	#genes	#miRNAs
Fatty acid biosynthesis	4.85e-16	1	2
Hippo signaling pathway	2.29e-14	36	4
Lysine degradation	3.74e-05	10	4
Adherens junction	4.68e-05	19	4
Oocyte meiosis	0.000156	26	5
Proteoglycans in cancer	0.000156	37	5
Fatty acid metabolism	0.000534	4	3
TGF-beta signaling pathway	0.000637	16	4
Viral carcinogenesis	0.000938	39	4
Cell cycle	0.00142	30	5
Thyroid hormone signaling pathway	0.00194	23	5
Central carbon metabolism in cancer	0.00203	13	3
ErbB signaling pathway	0.00224	16	4
Circadian entrainment	0.00224	13	5
Endometrial cancer	0.00944	12	4

## Sheet: SDCBP2-AS1 (ENST00000446423)
KEGG pathway	p-value	#genes	#miRNAs
Prion diseases	2.41482419596e-09	17	6
Proteoglycans in cancer	2.5379730925e-08	100	6
ECM-receptor interaction	2.62633631409e-08	39	6
TGF-beta signaling pathway	2.24012530027e-07	48	6
Viral carcinogenesis	2.24012530027e-07	98	6
Cell cycle	3.26451006122e-07	72	6
Hippo signaling pathway	4.3488764093e-07	68	6
Thyroid hormone signaling pathway	2.23143631191e-06	63	6
Protein processing in endoplasmic reticulum	3.31340932574e-06	86	6
Adherens junction	1.42763038486e-05	40	6
Glioma	1.42763038486e-05	37	6
Fatty acid biosynthesis	1.94113018788e-05	5	5
Renal cell carcinoma	3.39697244385e-05	41	6
Oocyte meiosis	7.1380990621e-05	59	6
Lysine degradation	9.3054584078e-05	23	6
Thyroid cancer	0.000199661548573	19	6
FoxO signaling pathway	0.000257195771057	69	6
Pathways in cancer	0.000257195771057	174	6
Colorectal cancer	0.000299157655593	35	6
p53 signaling pathway	0.000451439263312	40	6
Chronic myeloid leukemia	0.000518623103509	41	6
Focal adhesion	0.000530930726917	100	6
AMPK signaling pathway	0.000665423156081	64	6
Inositol phosphate metabolism	0.00130295583791	30	5
Bacterial invasion of epithelial cells	0.00130295583791	42	6
Glycosaminoglycan biosynthesis - chondroitin sulfate / dermatan sulfate	0.00177666151846	11	5
Endometrial cancer	0.00184927437923	29	6
Progesterone-mediated oocyte maturation	0.00219525416017	47	6
Non-small cell lung cancer	0.00243901287264	29	6
Neurotrophin signaling pathway	0.00250299535381	60	6
Ubiquitin mediated proteolysis	0.00262128245653	69	6
Axon guidance	0.00300920962115	57	6
mTOR signaling pathway	0.00310978228089	34	6
Signaling pathways regulating pluripotency of stem cells	0.00322065995033	66	6
Fatty acid metabolism	0.00345280386592	21	6
mRNA surveillance pathway	0.00614340158615	48	6
Sphingolipid signaling pathway	0.00616946955245	54	6
Transcriptional misregulation in cancer	0.00616946955245	78	6
Central carbon metabolism in cancer	0.00616946955245	34	6
Prostate cancer	0.00627802462555	47	6
Melanoma	0.00943477766198	36	6
Hepatitis B	0.010695117166	63	6
Phosphatidylinositol signaling system	0.0111705570566	38	6
Endocytosis	0.0132302238649	88	6
Bladder cancer	0.0162103314892	23	6
Glycosaminoglycan biosynthesis - keratan sulfate	0.0242498961053	9	5
Pancreatic cancer	0.0242498961053	33	6
Lipoic acid metabolism	0.0294389200133	3	4
Acute myeloid leukemia	0.0345696836169	28	6
Small cell lung cancer	0.0345696836169	41	6
Adrenergic signaling in cardiomyocytes	0.0401361636223	58	6
Insulin signaling pathway	0.0492031706105	63	6

## Sheet: MIR22HG (ENST00000334146)
KEGG pathway	p-value	#genes	#miRNAs
Prion diseases	1.04328503994e-16	6	2
Proteoglycans in cancer	2.6628861381e-08	49	2
Hepatitis B	3.49958581096e-08	45	2
Pathways in cancer	4.5394205461e-07	86	2
Chronic myeloid leukemia	5.43430609241e-07	27	2
Glioma	1.65285174505e-06	22	2
Viral carcinogenesis	2.60470221676e-06	46	2
Colorectal cancer	5.79083009662e-06	24	2
Thyroid hormone signaling pathway	6.65113867783e-06	37	2
Bacterial invasion of epithelial cells	6.65113867783e-06	26	2
Renal cell carcinoma	6.65113867783e-06	25	2
Pancreatic cancer	6.65113867783e-06	24	2
Bladder cancer	6.65113867783e-06	19	2
Prolactin signaling pathway	6.78130437734e-06	25	2
FoxO signaling pathway	9.52096586451e-06	40	2
TGF-beta signaling pathway	9.99952062093e-06	22	2
Focal adhesion	3.64823090525e-05	54	2
mRNA surveillance pathway	4.99307299796e-05	28	2
Prostate cancer	4.99307299796e-05	29	2
Sphingolipid signaling pathway	8.30965934525e-05	33	2
p53 signaling pathway	0.000141598005491	23	2
mTOR signaling pathway	0.00018484457929	21	2
Neurotrophin signaling pathway	0.000209763057211	35	2
Signaling pathways regulating pluripotency of stem cells	0.000421547068353	32	2
Non-small cell lung cancer	0.000435022198346	18	2
Melanoma	0.00075117186772	19	2
Shigellosis	0.000811473513373	19	2
Small cell lung cancer	0.000811473513373	25	2
Regulation of actin cytoskeleton	0.000923269295567	46	2
Endometrial cancer	0.0010148106762	18	2
Axon guidance	0.00208199634864	28	2
Adrenergic signaling in cardiomyocytes	0.0023733853673	28	2
Hippo signaling pathway	0.00242908945408	35	2
PI3K-Akt signaling pathway	0.00263874071365	66	2
Estrogen signaling pathway	0.0029410570368	23	2
Thyroid cancer	0.00340155245663	9	2
Hepatitis C	0.00355630995852	34	2
Long-term depression	0.00755036113557	13	2
