# Supplementary material for: Competing endogenous RNAs in human astrocytes: crosstalk and interacting networks in response to lipotoxicity
Source: Front Neurosci. 2023 Nov 13;17:1195840. doi: 10.3389/fnins.2023.1195840 (PMC10679742; doi:10.3389/fnins.2023.1195840)
Supplement: Supplementary file 5 [file Table_5.XLSX]

## Sheet: Hoja1
RNA	Biotype	BioGPS	CNS microRNA profiles	miTED
AC092687.3 axes (Figure 5A)
AC092687.3	lncRNA	No data
hsa-let-7e-5p	miRNA		Average expression in astrocytes	Expressed in PD, HD, and Hippocampal sclerosis ILAE type 1 but without difference respecting healthy controls (BioProject PRJNA295431, PRJNA272617, and PRJNA512243, respectively)
PMAIP1	protein-coding	Expression more than 10X the median in astrocytes. Less expression than the median in the whole brain.
SREBF2	protein-coding	Median expression in the whole brain. Less expression than the median in astrocytes and medial temporal gyrus.
FNIP1	protein-coding	Median expression in the CNS.
MEG3 axes (Figure 5B and C)
MEG3	lncRNA	Higher expression in CNS than the median expression of all tissues. With cingulate cortex and amygdala more than 30X the median.
hsa-let-7b-5p	miRNA		Highly expressed in astrocytes	Slightly reduced in PD (BioProject PRJNA295431)
hsa-let-7d-5p	miRNA		Variable expression in astrocytes	Slightly increased in PD (BioProject PRJNA295431)
hsa-let-7e-5p	miRNA		Average expression in astrocytes	Expressed in PD, HD, and Hippocampal sclerosis ILAE type 1 but without difference respecting healthy controls (BioProject PRJNA295431, PRJNA272617, and PRJNA512243, respectively)
hsa-let-7g-5p	miRNA		Variable expression in astrocytes	Slightly increased in PD (BioProject PRJNA295431)
hsa-miR-106a-5p	miRNA		Highly expressed in spinal cord astrocytes	Expressed in PD, HD, and Hippocampal sclerosis ILAE type 1 but without difference respecting healthy controls (BioProject PRJNA295431, PRJNA272617, and PRJNA512243, respectively)
NME4	protein-coding	Median expression in the whole brain. Higher expression than the median in the prefrontal and cingulate cortex
ATF6B	protein-coding	Median expression in the whole brain. Higher expression than the median in the pineal gland
LDLR	protein-coding	Median expression in the whole brain.
MIR22HG axes (Figure 5D)
MIR22HG	lncRNA	Median expression in all the brain, except pineal gland with more than 3X the median.
hsa-miR-17-5p	miRNA		Highly expressed in astrocytes.	Expressed in PD, HD, and Hippocampal sclerosis ILAE type 1 but without difference respecting healthy controls (BioProject PRJNA295431, PRJNA272617, and PRJNA512243, respectively)
GNA13	protein-coding	Whole brain expression behind the median. Expression of pineal gland, amygdala, prefrontal cortex, hypothalamus, parietal lobe, cingulate cortex, and cerebellum peduncles slightly above the median.
SDCBP2-AS1 axes (Figure 5E)
SDCBP2-AS1	lncRNA	Highly expressed in neurons (more than 10X the median). More than 3X the median expression in midbrain and cerebral cortex. Reduced expression in medial temporal gyrus, hippocampus, and astrocytes.
hsa-miR-27a-3p	miRNA		Highly expressed in astrocytes	Slightly reduced in Hippocampal sclerosis ILAE type 1 (PRJNA272617)
hsa-miR-27b-3p	miRNA		Average expression in astrocytes	Slightly reduced in PD (PRJNA295431)
hsa-miR-26a-5p	miRNA		Average expression in astrocytes	Expressed in PD, HD, and Hippocampal sclerosis ILAE type 1 but without difference respecting healthy controls (BioProject PRJNA295431, PRJNA272617, and PRJNA512243, respectively)
hsa-miR-101-3p	miRNA		Average expression in astrocytes	Expressed in PD, HD, and Hippocampal sclerosis ILAE type 1 but without difference respecting healthy controls (BioProject PRJNA295431, PRJNA272617, and PRJNA512243, respectively)
MAPK6	protein-coding	Median expression in the CNS, 3X the median in the prefrontal cortex.
B3GNT2	protein-coding	Median expression inthe CNS.
KITLG	protein-coding	Median expression in the CNS.
ACSL3	protein-coding	More than 3X the median in the prefrontal cortex, amygdala, hypothalamus, thalamus, and occipital lobe.
TMEM41B	protein-coding	Median expression in the CNS.
CSF1	protein-coding	Median expression in the CNS.
ZFP36	protein-coding	Reduced expression in the CNS, except for spinal cord, which is above the median expression.
