# Supplementary material for: Competing endogenous RNAs in human astrocytes: crosstalk and interacting networks in response to lipotoxicity
Source: Front Neurosci. 2023 Nov 13;17:1195840. doi: 10.3389/fnins.2023.1195840 (PMC10679742; doi:10.3389/fnins.2023.1195840)
Supplement: Supplementary file 6 [file Table_6.XLSX]

## Sheet: Sheet1
gene_id	symbol	biotype	AstroPA.R2A	AstroPA.R2B	AstroPA.R3A	AstroPA.R3B	AstroVH.R2A	AstroVH.R2B	AstroVH.R3A	AstroVH.R3B
ENSG00000059573	ALDH18A1	protein_coding	49.52	47.91	49.93	49.64	64.83	62.35	63.83	65.79
ENSG00000125398	SOX9	protein_coding	41.69	43.52	30.39	43.04	39.39	47.08	49.36	46.67
ENSG00000131095	GFAP	protein_coding	10.91	18	68.83	89.46	23.64	21.03	176.09	137.97
ENSG00000165474	GJB2	protein_coding	39.85	41.99	13.83	17.05	19.84	21.69	9.08	9.59
ENSG00000079215	SLC1A3	protein_coding	55.58	56.94	76.03	49.91	24.81	26.84	36.61	43.93
